# Supplementary material for: Ohmic heating assisted synthesis of coumarinyl porphyrin derivatives
Source: Royal Society of Chemistry journal article supplement (doi:10.1039/c5ra11156k), 2015-01-01

# SUPPORTING INFORMATION

## OHMIC HEATING ASSISTED SYNTHESIS OF COUMARINYLPORPHYRIN DERIVATIVES

Mariana F. do C. Cardoso<sup>1,2</sup>, Ana T. P. C. Gomes<sup>1</sup>, Vera L. M. Silva<sup>1</sup>, Artur M. S. Silva<sup>1</sup>, Maria G. P. M. S. Neves<sup>1</sup>, Fernando de C. da Silva<sup>2</sup>, Vitor F. Ferreira<sup>2</sup> and José A. S. Cavaleiro<sup>1</sup>

<sup>1</sup>*Department of Chemistry and QOPNA, University of Aveiro, 3810-193 Aveiro, Portugal*

<sup>2</sup>*Universidade Federal Fluminense, Instituto de Química, Departamento de Química Orgânica, Valonguinho, 24020-150, Niterói, RJ*

### **{2-(4-Phenyl-5-oxo-2,3,4,5-tetrahydro-2H-pyrano[3,2-c]chromen-2-yl)-5,10,15,20-tetraphenylporphyrinato}zinc(II) (6a.1)**

<sup>1</sup>H NMR (500 MHz, CDCl<sub>3</sub>): δ = 2.42 (dt, *J* 14.5, 11.0 Hz, 1H, H-3'), 2.94 (ddd, *J* 14.5, 6.3, 1.5 Hz, 1H, H-3'), 3.82 (dd, *J* 11.0, 6.3 Hz, 1H, H-4'), 5.26 (br d, *J* 11.0 Hz, 1H, H-2'), 7.17–7.29 (m, 6H, H-2'',3'',4'',5'',6'', H-9'), 7.34 (dd, *J* 8.0, 0.5 Hz, 1H, H-7'), 7.36–7.38 (m, 1H, *m,p*-Ph-20), 7.53 (ddd, *J* 8.0, 7.0, 1.0 Hz, 1H, H-8'), 7.73–7.81 (m, 12H, 11H *m,p*-Ph, H-10'), 8.18–8.22 (m, 7H, *o*-Ph), 8.27–8.28 (m, 1H, *o*-Ph-20), 8.74 (d, *J* 4.6 Hz, 1H, H<sub>β</sub>), 8.89 (d, *J* 4.6 Hz, 1H, H<sub>β</sub>), 8.91 (d, *J* 4.6 Hz, 1H, H<sub>β</sub>), 8.93 (s, 2H, H-12 and H-13), 8.95 (d, *J* 4.6 Hz, 1H, H<sub>β</sub>), 9.18 (s, 1H, H-3). <sup>13</sup>C NMR (75 MHz, CDCl<sub>3</sub>): δ = 40.2 (C-4'), 42.3 (C-3'), 76.1 (C-2'), 104.7 (C-4a'), 115.9 (C-10a'), 116.6 (C-7'), 123.0 (C-10'), 123.6, 126.5, 126.6 (C-2'',6''), 126.6 (C-9'), 126.6, 126.7, 127.6, 127.7, 128.5, 128.6, 128.7 (*Cm,p*-Ph), 131.6, 131.8 (C-8'), 132.3, 132.5, 132.6 (C<sub>β</sub>), 134.4, 134.5, 134.6 (*Co*-Ph), 143.4 (C-1), 145.6 (C-1''), 150.3, 150.5, 150.6, 150.9 (C-10, C-11, C-14, C-15), 152.8 (C-6a'), 161.4 (C-10b'), 162.4 (C-5'). UV/vis (CHCl<sub>3</sub>): λ<sub>max</sub> (log ε): 425 (4.91), 553 (4.55), 595 (4.00) nm. HRMS (ESI<sup>+</sup>): *m/z* [M+H]<sup>+</sup> calcd. for C<sub>62</sub>H<sub>40</sub>N<sub>4</sub>O<sub>3</sub>Zn: 953.2392; found: 953.2394.

RMN <sup>1</sup>H:

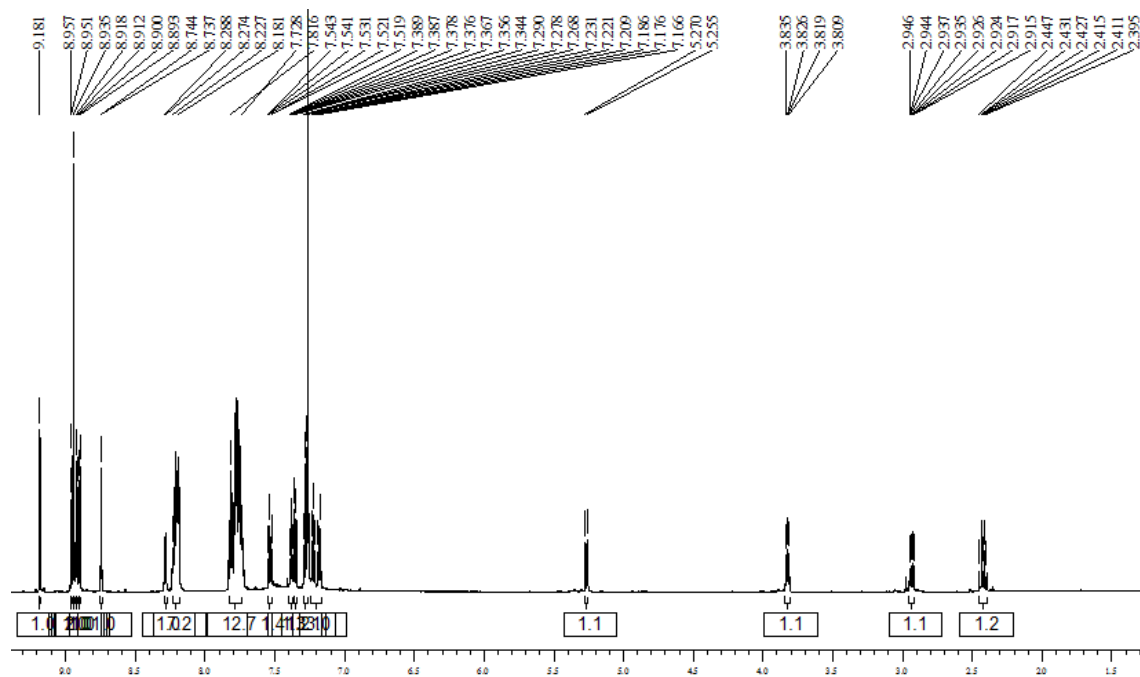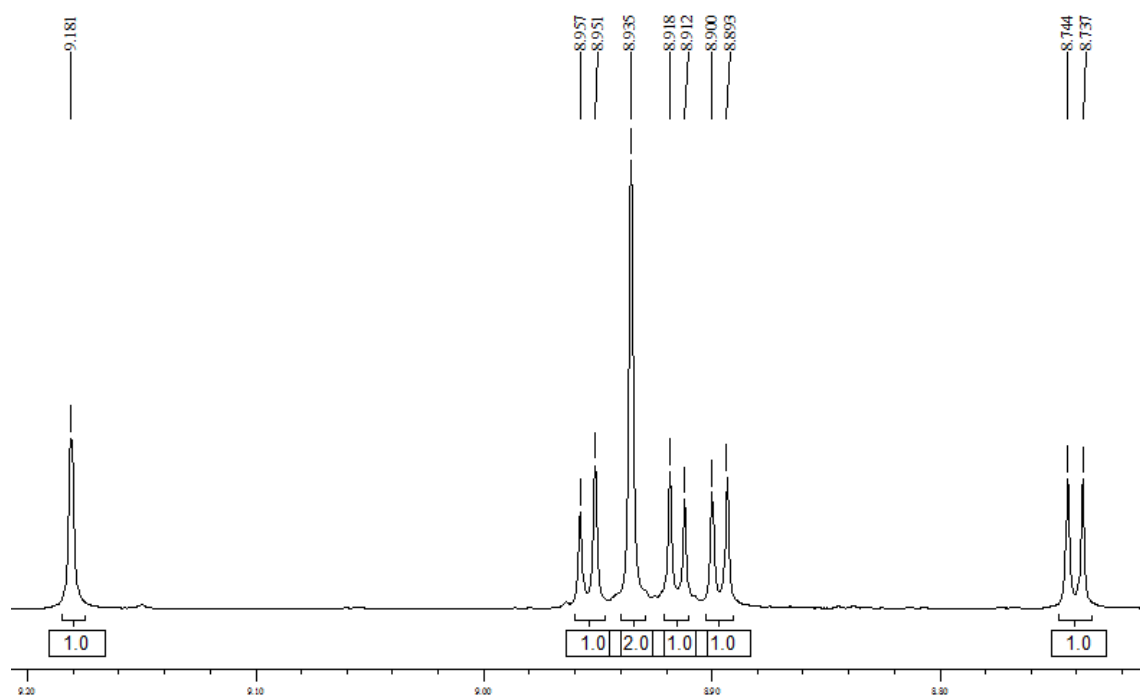

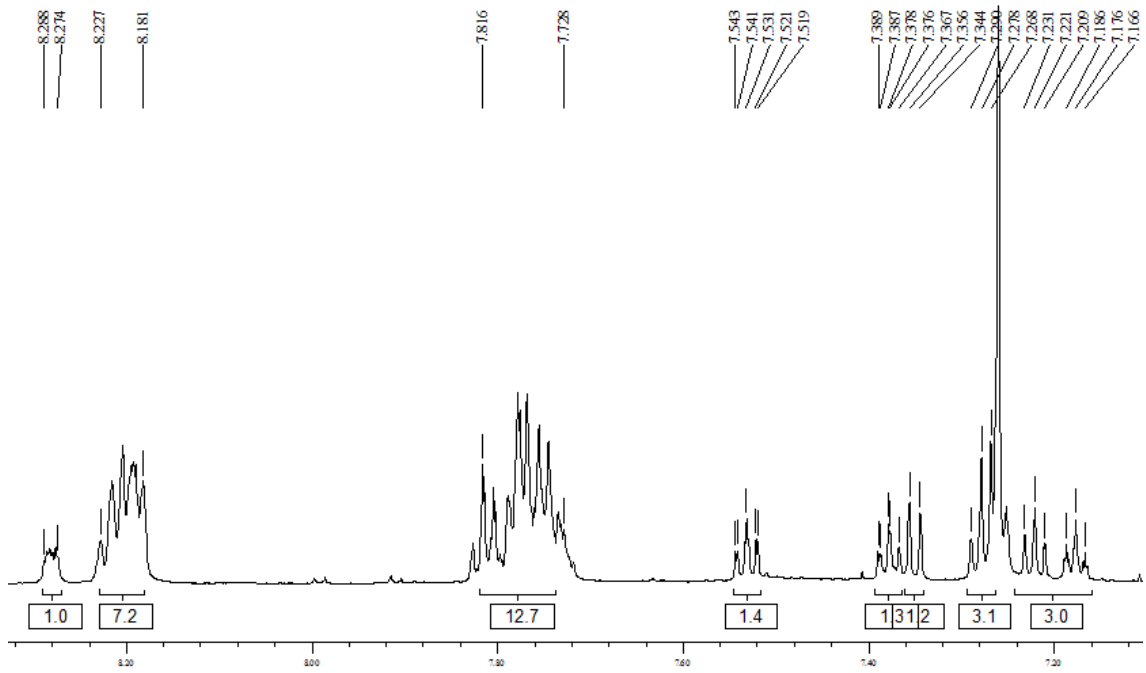

RMN <sup>13</sup>C:

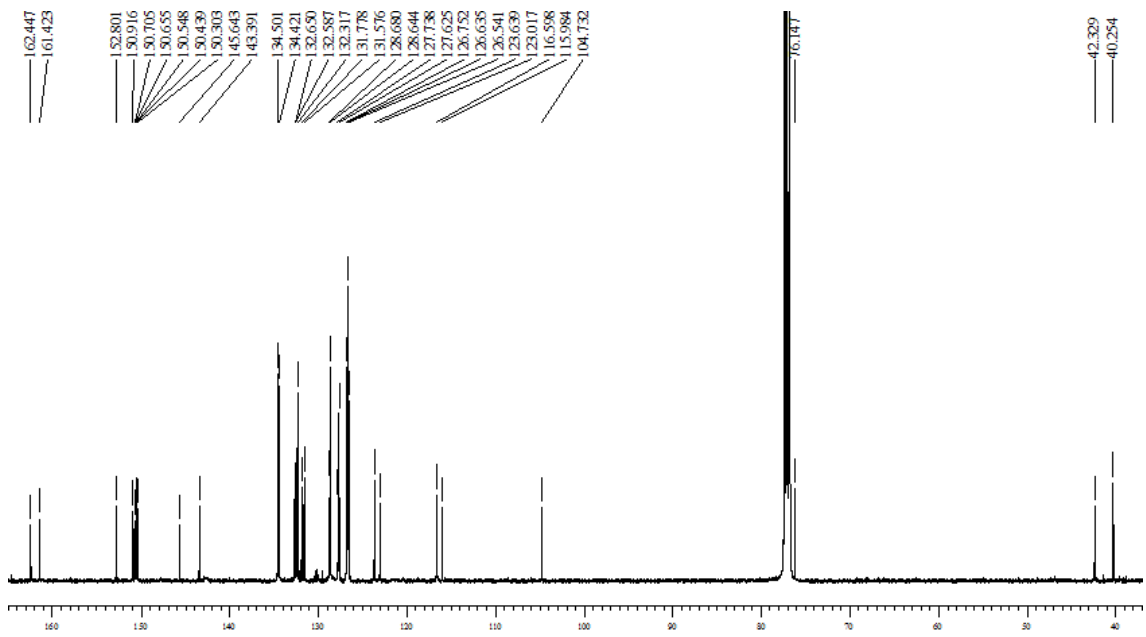

HRMS (ESI<sup>+</sup>):

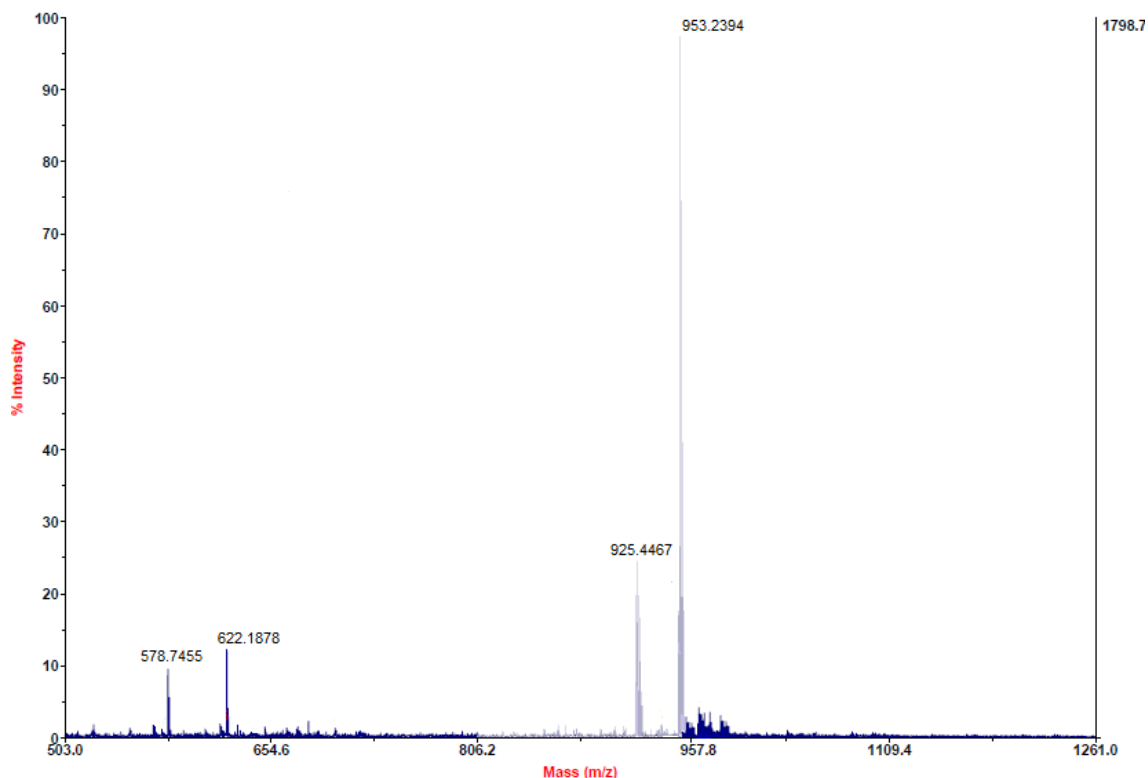

**{2-(4-Phenyl-5-oxo-2,3,4,5-tetrahydro-2*H*-pyrano[3,2-*c*]chromen-2-yl)-5,10,15,20-tetraphenylporphyrinato}zinc(II) (6a.2)**

<sup>1</sup>H NMR (500 MHz, CDCl<sub>3</sub>): δ = 2.80 (dd, *J* 14.3, 11.7 Hz, 1H, H-3'), 3.15 (m, 1H, H-3'), 4.33 (d, *J* 5.1 Hz, 1H, H-4'), 5.47 (dd, *J* 11.7, 1.3 Hz, 1H, H-2') 7.03–7.31 (m, 6H, H-2'',3'',4'',5'',6'', H-9'), 7.38 (dd, *J* 7.5, 1.2 Hz, 1H, H-7'), 7.50-7.53 (m, 1H, *m,p*-Ph-20), 7.59 (td, *J* 7.6, 1.2 Hz, 1H, H-8'), 7.74-7.81 (m, 12H, 11H *m,p*-Ph, H-10'), 8.18-8.25 (m, 7H, *o*-Ph), 8.37-8.39 (m, 1H, *o*-Ph-20), 8.58 (d, *J* 4.7 Hz, 1H, H<sub>β</sub>), 8.85 (d, *J* 4.7 Hz, 1H, H<sub>β</sub>), 8.92 (d, *J* 4.7 Hz, 1H, H<sub>β</sub>), 8.93 (s, 2H, H-12 and H-13), 8.96 (d, *J* 4.7 Hz, 1H, H<sub>β</sub>), 9.16 (s, 1H, H-3). <sup>13</sup>C NMR (75 MHz, CDCl<sub>3</sub>): δ = 35.8 (C-4'), 36.4 (C-3'), 69.2 (C-2'), 101.9 (C-4a'), 115.6 (C-10a'), 116.7 (C-7'), 123.1, 123.5 (C-10'), 125.4, 126.5, 126.6, 126.7 (C-2'',6''), 126.6 (C-9'), 127.6, 127.7, 128.2, 128.3, 128.6 (*Cm,p*-Ph), 131.5, 131.6 (C-8'), 132.3, 132.9, 133.0, 133.6 (C<sub>β</sub>), 134.4, 134.5, 134.6 (*Co*-Ph), 143.1 (C-1), 146.3 (C-1''), 150.1, 150.5, 150.6, 150.7 (C-10, C-11, C-14, C-15), 152.9 (C-6a'), 161.3 (C-10b'), 162.5 (C-5'). UV/vis (CHCl<sub>3</sub>): λ<sub>max</sub> (log ε): 425 (4.90), 552 (4.55), 596 (4.00) nm. HRMS (ESI<sup>+</sup>): *m/z* [M+H]<sup>+</sup> calcd. for C<sub>62</sub>H<sub>40</sub>N<sub>4</sub>O<sub>3</sub>Zn: 953.2392; found: 953.2393.

RMN <sup>1</sup>H:

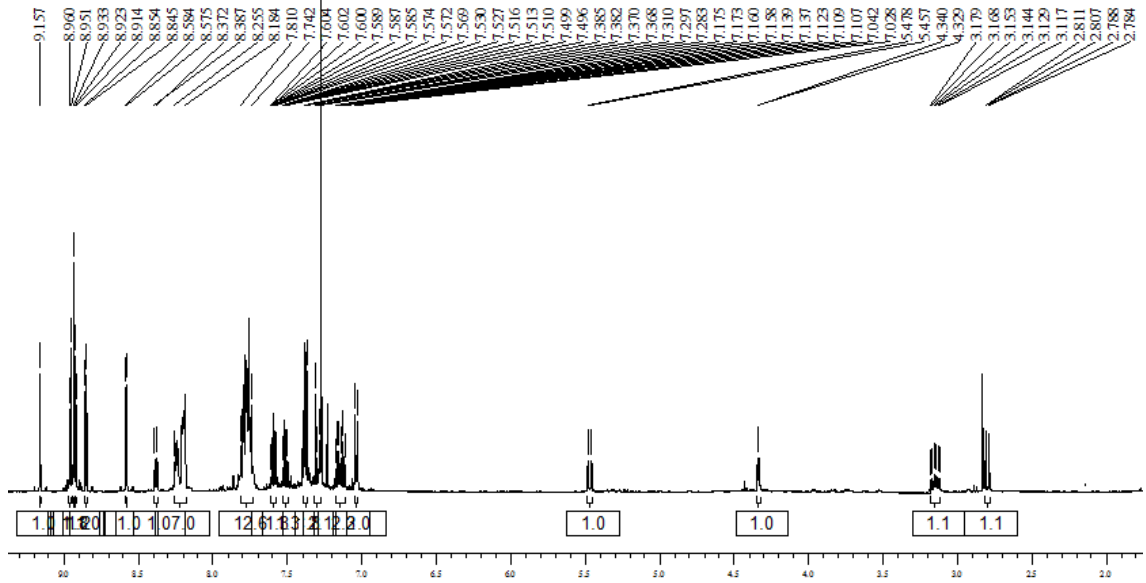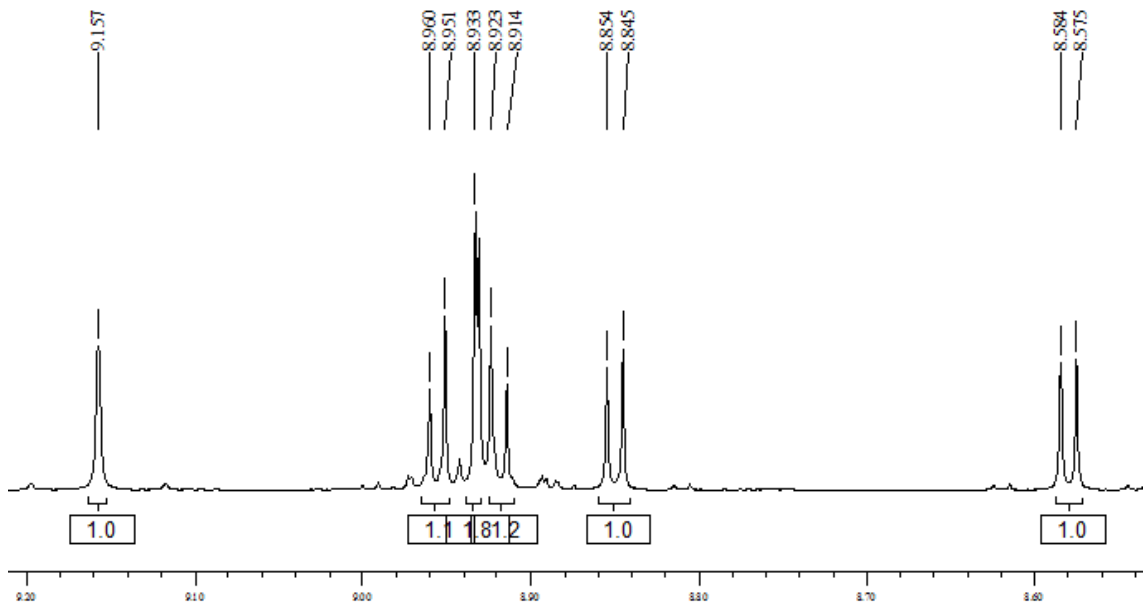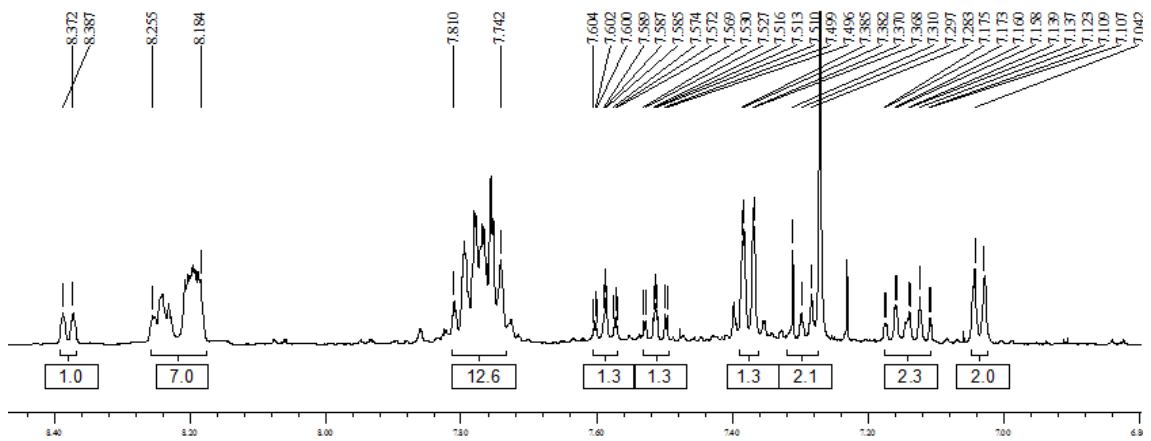

RMN  $^{13}\text{C}$ :

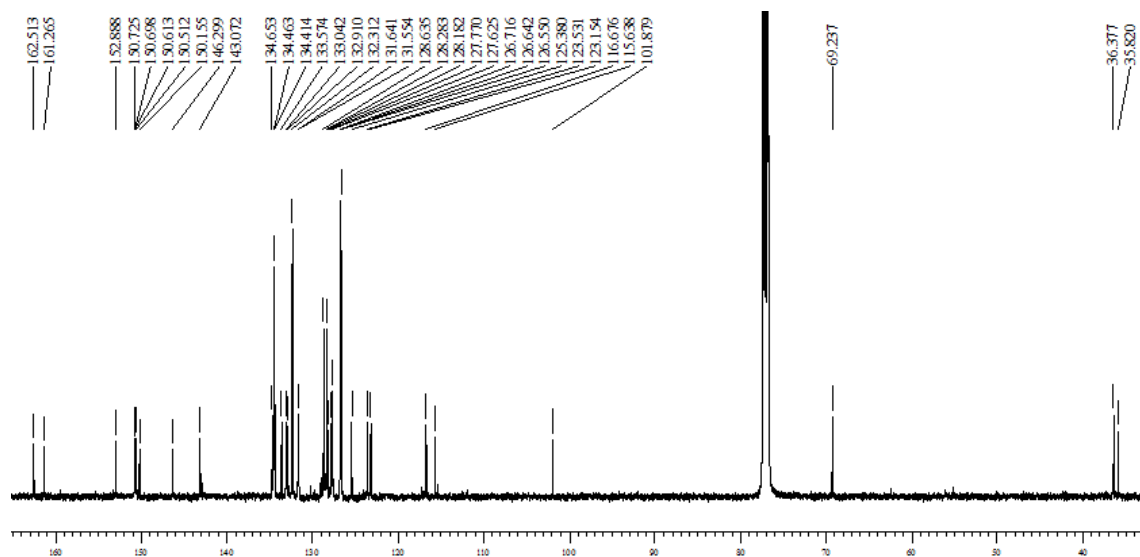

HRMS (ESI $^{+}$ ):

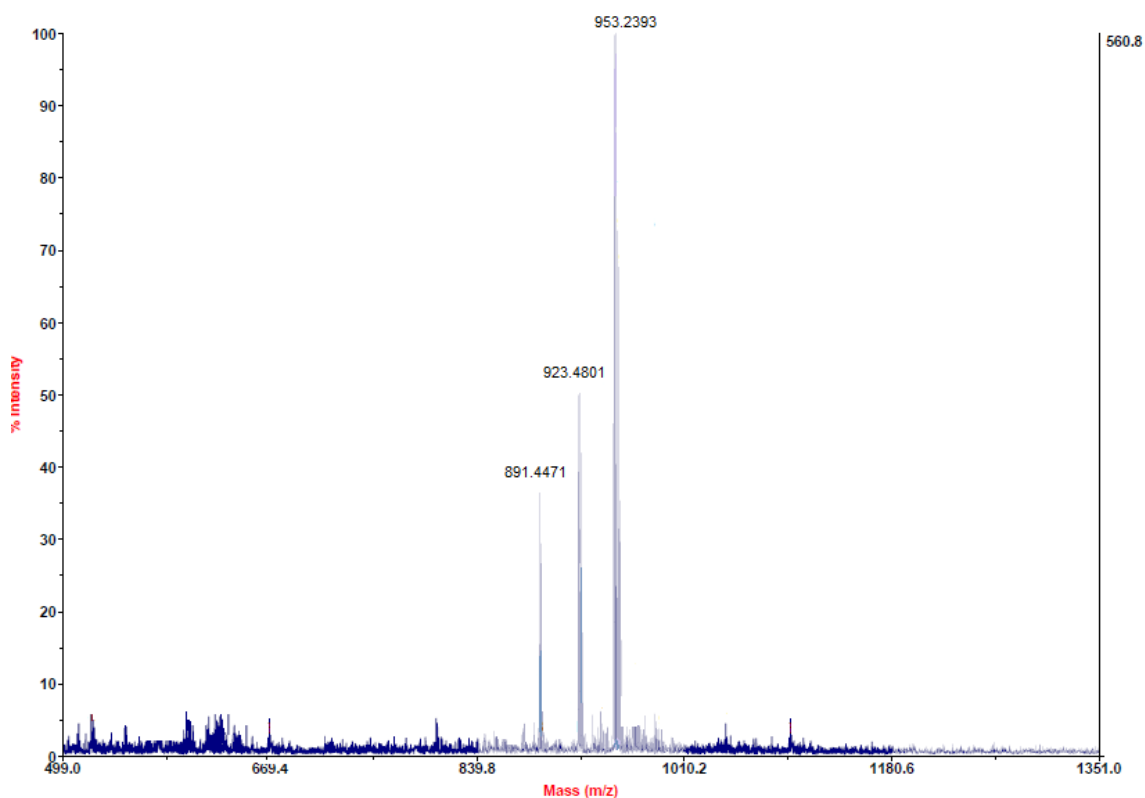

**{2-(4-(4-Methoxyphenyl)-5-oxo-2,3,4,5-tetrahydro-2H-pyrano[3,2-c]chromen-2-yl)-5,10,15,20-tetraphenylporphyrinato}zinc(II) (6b.1)**

$^1\text{H}$  NMR (500 MHz,  $\text{CDCl}_3$ ):  $\delta$  = 2.42 (dt,  $J$  14.2, 11.1 Hz, 1H, H-3'), 2.90 (ddd,  $J$  14.2, 6.5, 1.3 Hz, 1H, H-3'), 3.71 (s, 3H,  $\text{OCH}_3$ ), 3.78 (dd,  $J$  11.1, 6.5 Hz, 1H, H-4'), 5.25 (br

d,  $J$  11.1 Hz, 1H, H-2'), 6.79 (d,  $J$  8.9 Hz, 2H, H-3'',5''), 7.16 (dd,  $J$  8.9, 1.8 Hz, 2H, H-2'',6''), 7.21 (dt,  $J$  8.5, 2.0 Hz, 1H, H-9'), 7.34-7.30 (m, 2H, *m,p*-Ph-20, H-7'), 7.52 (ddd,  $J$  8.5, 7.2, 1.5 Hz, 1H, H-8'), 7.73-7.80 (m, 12H, 11H *m,p*-Ph and H-10'), 8.17-8.23 (m, 7H *o*-Ph), 8.27-8.28 (m, 1H, *o*-Ph-20), 8.74 (d,  $J$  4.6 Hz, 1H, H $_{\beta}$ ), 8.89 (d,  $J$  4.6 Hz, 1H, H $_{\beta}$ ), 8.91 (d,  $J$  4.6 Hz, 1H, H $_{\beta}$ ), 8.93 (s, 2H, H-12 and H-13), 8.95 (d,  $J$  4.6 Hz, 1H, H $_{\beta}$ ), 9.17 (s, 1H, H-3).  $^{13}\text{C}$  NMR (75 MHz,  $\text{CDCl}_3$ ):  $\delta$  = 39.4 (C-4'), 42.3 (C-3'), 55.2 ( $\text{OCH}_3$ ), 76.1 (C-2'), 104.9 (C-4a'), 114.0 (C-10a'), 116.0, 116.6 (C-3'',5''), 120.4 (C-7'), 121.1, 121.4, 121.6 (C-2'',6''), 123.0, 123.6 (C-10'), 126.5, 126.6, 126.7, 127.6, 127.7 (*Cm,p*-Ph), 128.7 (C-9'), 131.5 (C-8'), 132.3, 132.6, 132.7 (C $_{\beta}$ ), 133.6, 133.7, 134.4, 134.5, 135.3 (*Co*-Ph), 142.4 (C-2), 142.6, 142.7, 142.8 (C-1), 145.7 (C-1''), 150.3, 150.4, 150.5, 150.6, 150.7, 150.9 (C-10, C-11, C-14, C-15), 152.8 (C-6a'), 156.1 (C-4''), 161.4 (C-10b'), 162.3 (C-5'). UV/vis ( $\text{CHCl}_3$ ):  $\lambda_{\text{max}}$  (log  $\epsilon$ ): 424 (4.93), 555 (4.57), 595 (4.55) nm. HRMS (ESI $^+$ ):  $m/z$   $[\text{M}+\text{H}]^+$  calcd. for  $\text{C}_{63}\text{H}_{42}\text{N}_4\text{O}_4\text{Zn}$ : 983.2498; found: 983.2495.

RMN  $^1\text{H}$ :

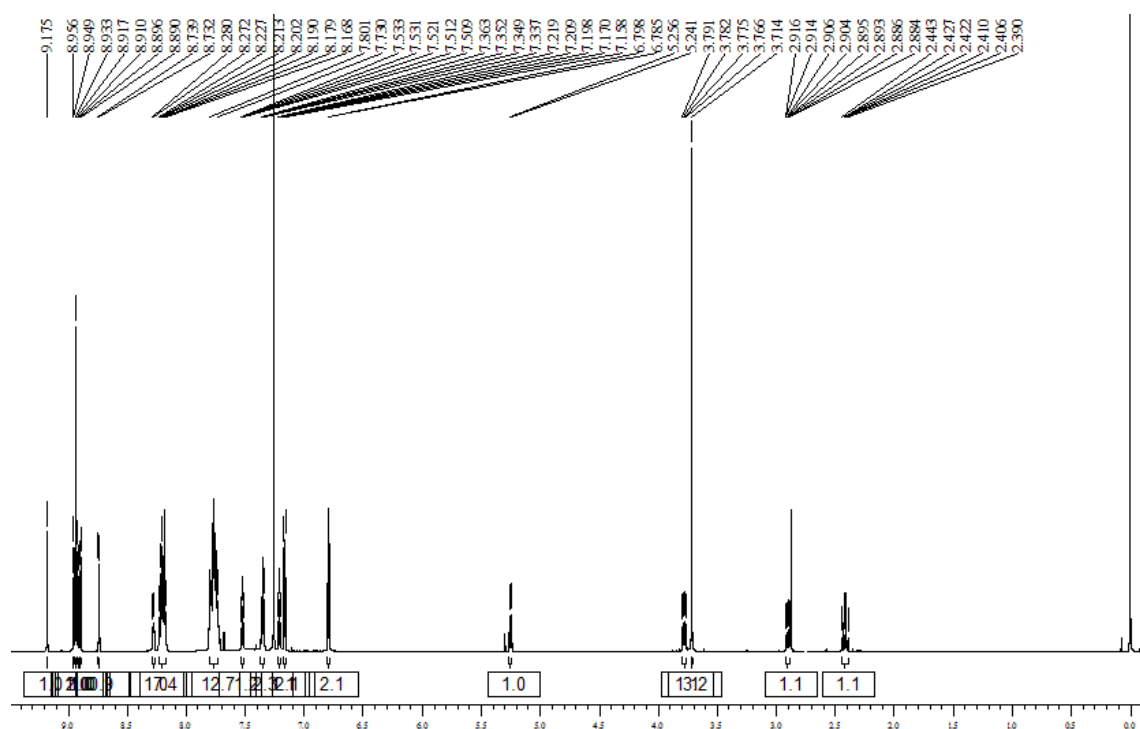

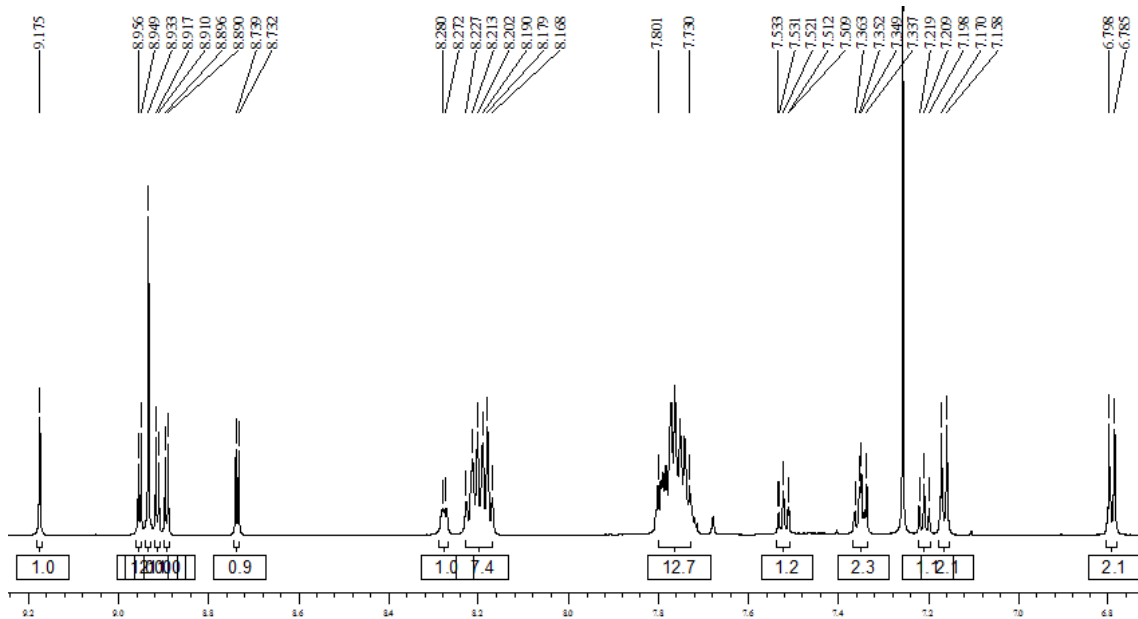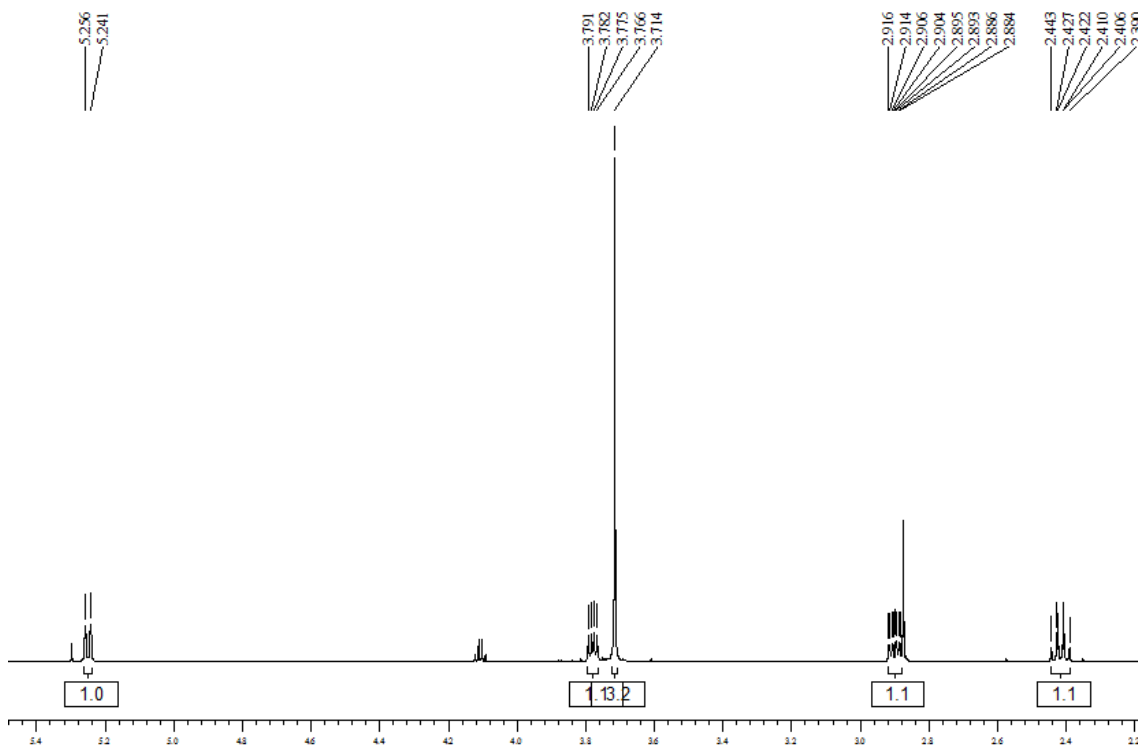



RMN  $^{13}\text{C}$ :

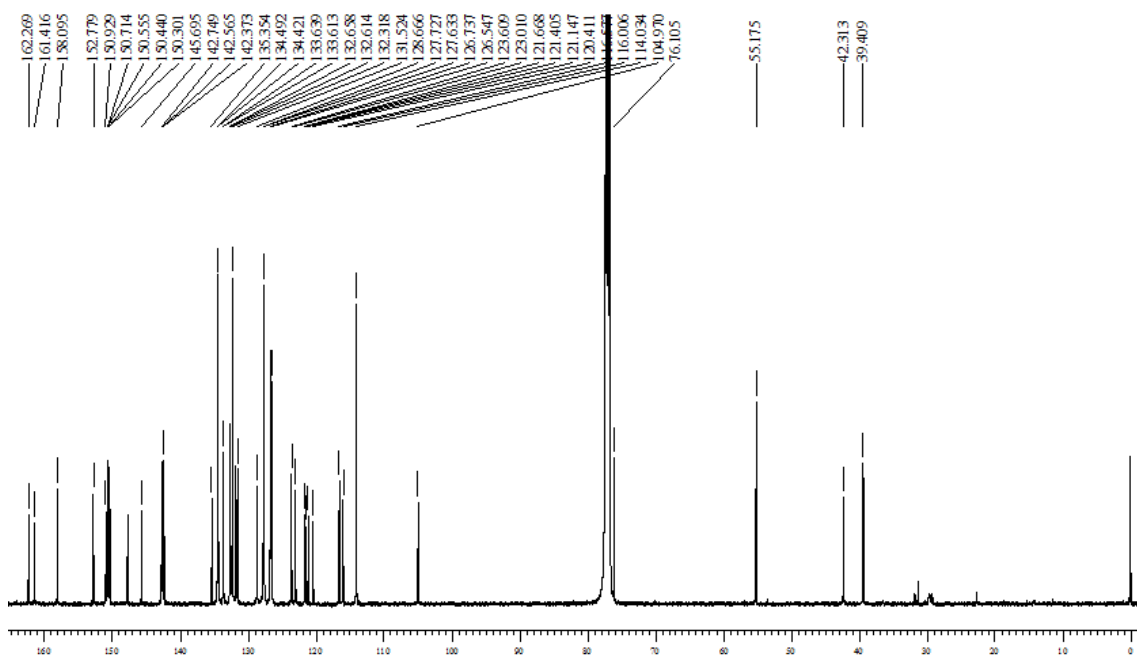

HRMS (ESI<sup>+</sup>):

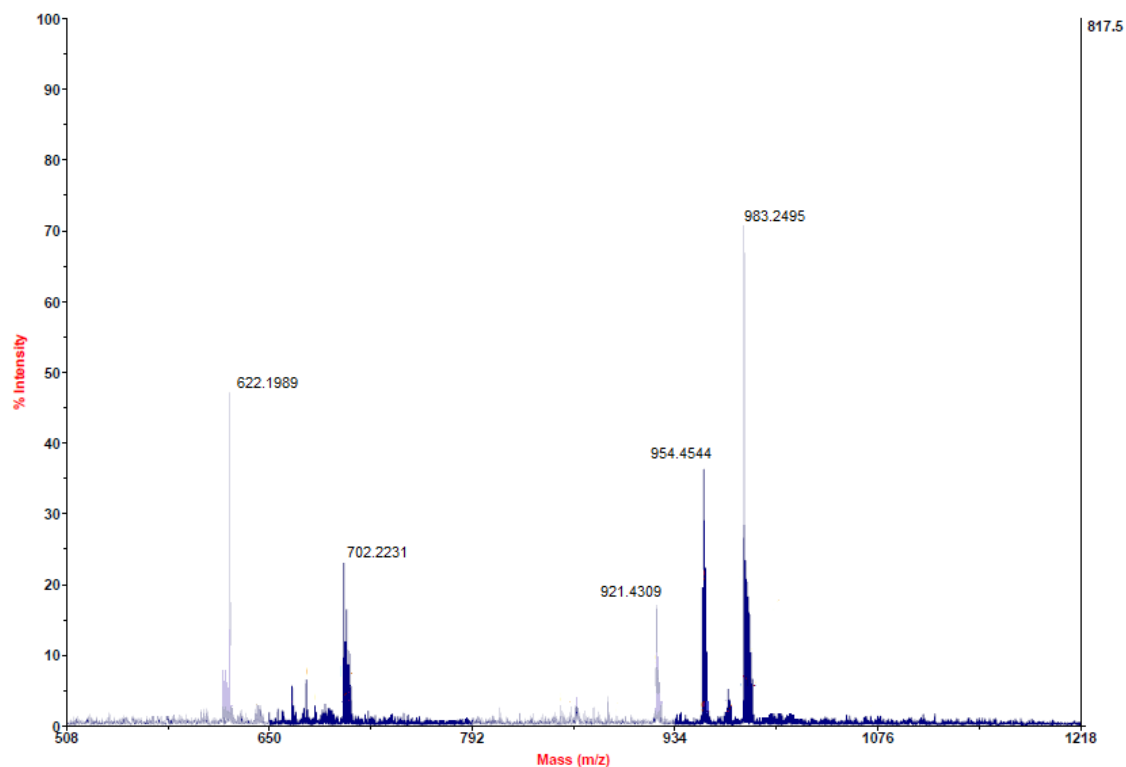

**{2-(4-(4-Methoxyphenyl)-5-oxo-2,3,4,5-tetrahydro-2*H*-pyrano[3,2-*c*]chromen-2-yl)-5,10,15,20-tetraphenylporphyrinato}zinc(II) (6b.2)**

$^1\text{H}$  NMR (500 MHz,  $\text{CDCl}_3$ ):  $\delta$  = 2.42 (dt,  $J$  14.4, 11.0 Hz, 1 H, H-3'), 2.91 (m, 1H, H-3'), 3.73 (s, 3H,  $\text{OCH}_3$ ), 3.78 (d,  $J$  5.4 Hz, 1H, H-4'), 5.24 (br d,  $J$  11.0 Hz, 1H, H-2'), 6.80 (d,  $J$  8.6 Hz, 2H, H-3'',5''), 7.18 (d,  $J$  8.6 Hz, 2H, H-2'',6''), 7.22 (d,  $J$  7.2 Hz, 1H,

H-9'), 7.33-7.36 (m, 2H, *m,p*-Ph-20, H-7'), 7.53 (td, *J* 7.2, 1.3 Hz, 1H, H-8'), 7.77-7.81 (m, 12H, 11H *m,p*-Ph and H-10'), 8.18-8.21 (m, 7H *o*-Ph), 8.26-8.29 (m, 1H, *o*-Ph-20), 8.74 (d, *J* 4.7 Hz, 1H, H<sub>β</sub>), 8.90 (d, *J* 4.7 Hz, 1H, H<sub>β</sub>), 8.92 (d, *J* 4.7 Hz, 1H, H<sub>β</sub>), 8.94 (s, 2H, H<sub>β</sub>, H-12 and H-13), 8.96 (d, *J* 4.7 Hz, 1H, H<sub>β</sub>), 9.17 (s, 1H, H-3). <sup>13</sup>C NMR (75 MHz, CDCl<sub>3</sub>): δ = 30.9 (C-4'), 38.7 (C-3'), 51.8 (OCH<sub>3</sub>), 68.1 (C-2'), 101.5 (C-4a'), 114.0 (C-10a'), 116.0, 116.5 (C-3'',5''), 120.5 (C-7'), 121.1, 121.3, 122.5 (C-2'',6''), 123.6 (C-10'), 126.4, 126.5, 126.6, 126.7 (C<sub>*m,p*</sub>-Ph), 127.6, 127.7 (C-9'), 131.2 (C-8'), 132.2, 132.3, 132.4, 132.6 (C<sub>β</sub>), 133.5, 134.4, 134.5 (C<sub>*o*</sub>-Ph), 142.3 (C-2), 142.5, 142.7, 142.8 (C-1), 145.6 (C-1''), 150.2, 150.4, 150.5, 150.6, 150.7, 150.9 (C-10, C-11, C-14, C-15), 152.4 (C-6a'), 157.5 (C-4''), 163.3 (C-10b'), 167.7 (C-5'). UV/vis (CHCl<sub>3</sub>): λ<sub>max</sub> (log ε): 423 (4.93), 554 (4.58), 595 (4.55) nm. HRMS (ESI<sup>+</sup>): *m/z* [M+H]<sup>+</sup> calcd. for C<sub>63</sub>H<sub>42</sub>N<sub>4</sub>O<sub>4</sub>Zn: 983.2498; found: 983.2497.

RMN <sup>1</sup>H:

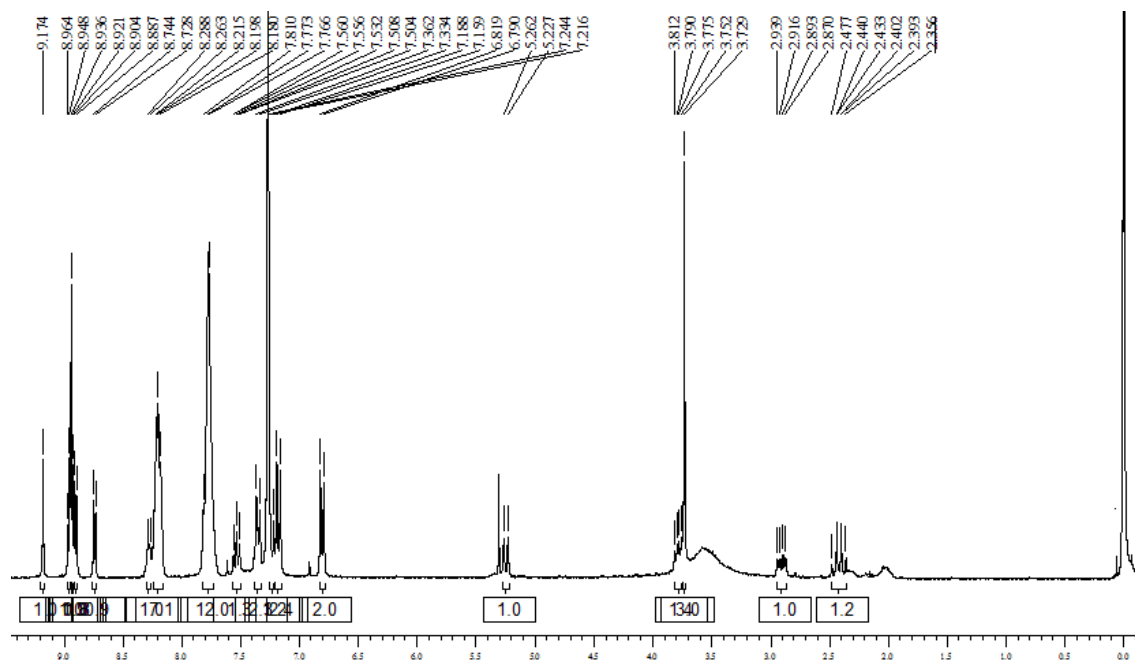

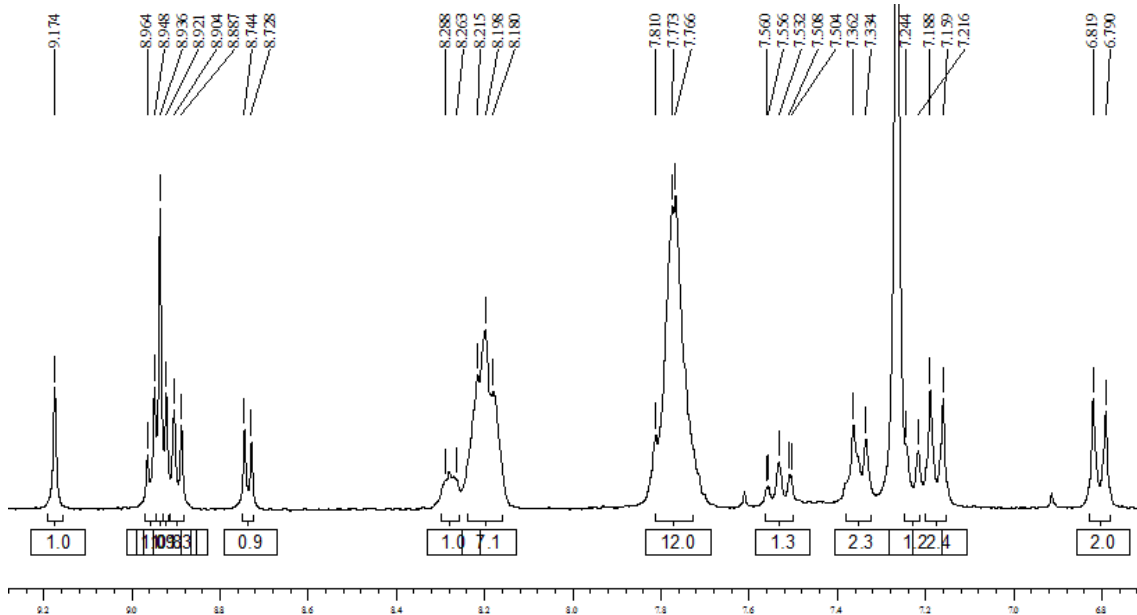

RMN <sup>13</sup>C:

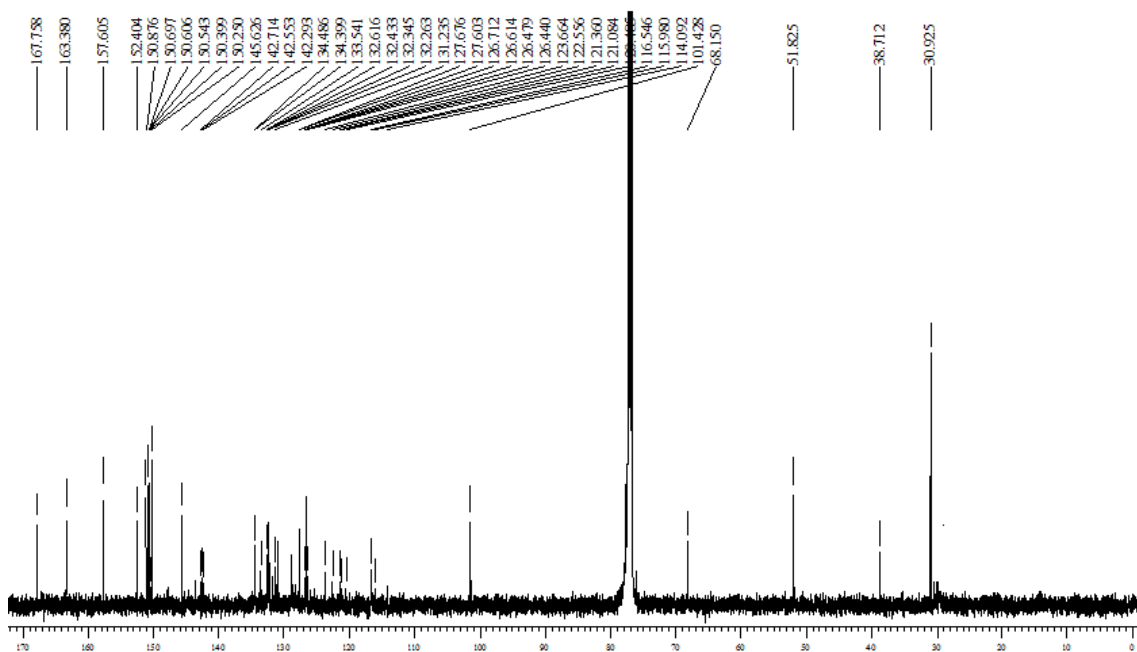

HRMS (ESI<sup>+</sup>):

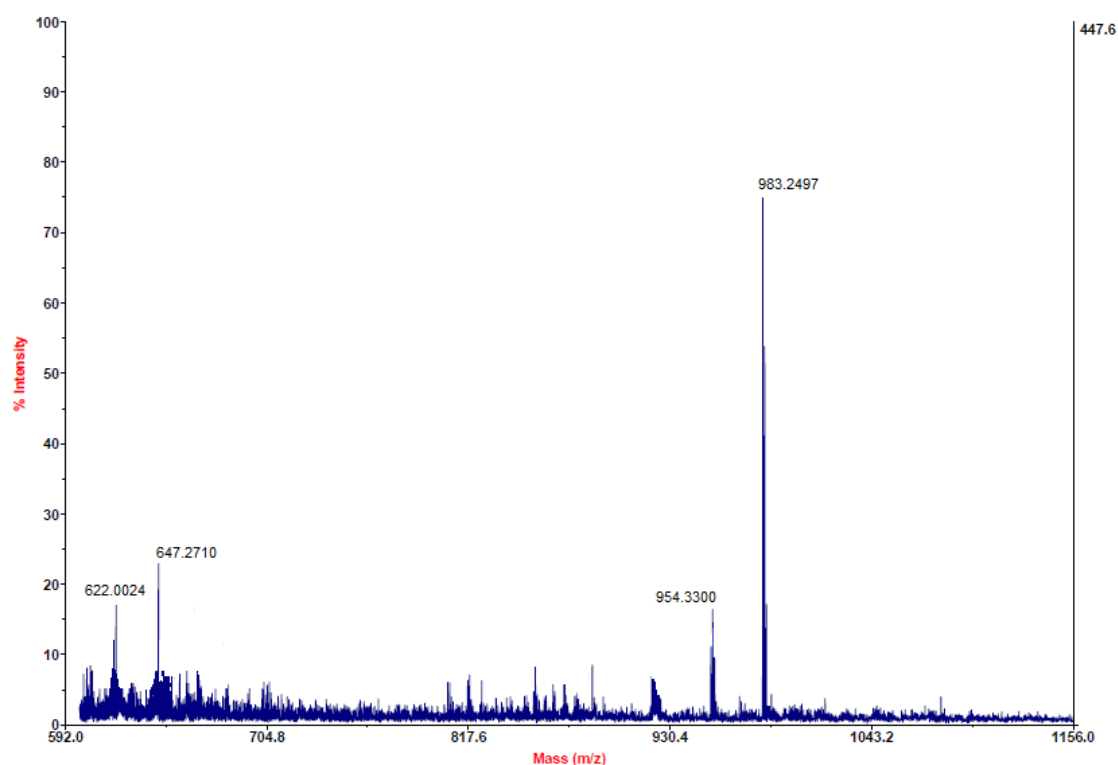

**{2-(4-(2-Chlorophenyl)-5-oxo-2,3,4,5-tetrahydro-2H-pyrano[3,2-c]chromen-2-yl)-5,10,15,20-tetraphenylporphyrinato}zinc(II) (6c.1)**

<sup>1</sup>H NMR (500 MHz, CDCl<sub>3</sub>): δ = 2.61 (dt, *J* 14.4, 11.7 Hz, 1H, H-3'), 3.04 (dd, *J* 14.5, 6.4 Hz, 1 H, H-3'), 4.07 (dd, *J* 11.5, 6.6 Hz, 1H, H-4'), 5.33 (br d, *J* 11.7 Hz, 1H, H-2'), 7.19–7.24 (m, 5H, H-3'',4'',5'',6'', H-9'), 7.35 (dd, *J* 8.5, 0.6 Hz, 1H, H-7'), 7.39-7.41 (m, 1H, *m,p*-Ph-20), 7.55 (ddd, *J* 8.5, 7.2, 1.5 Hz, 1H, H-8'), 7.72-7.81 (m, 11H, *m,p*-Ph), 7.83 (dd, *J* 8.0, 1.4 Hz, 1H, H-10'), 8.15-8.23 (m, 7H, *o*-Ph), 8.28 (d, *J* 7.2 Hz, 1H, *o*-Ph-20), 8.75 (d, *J* 4.6 Hz, 1H, H<sub>β</sub>), 8.87 (d, *J* 4.6 Hz, 1H, H<sub>β</sub>), 8.89 (d, *J* 4.6 Hz, 1H, H<sub>β</sub>), 8.93 (s, 2H, H-12 and H-13), 8.94 (d, *J* 4.6 Hz, 1H, H<sub>β</sub>), 9.09 (s, 1H, H-3). <sup>13</sup>C NMR (75 MHz, CDCl<sub>3</sub>): δ = 36.4 (C-4'), 37.8 (C-3'), 75.8 (C-2'), 102.7 (C-4a'), 115.9 (C-10a'), 119.7, 120.0 (C-5''), 120.3 (C-7'), 121.0, 121.3, 121.6 (C-3'' and C-6''), 123.1, 123.8 (C-10'), 126.4, 126.5, 126.6, 127.8 (*Cm,p*-Ph), 127.6, 127.7 (C-4''), 128.6 (C-9'), 131.7, 131.8 (C-8'), 132.3, 132.6, 133.0 (C<sub>β</sub>), 133.7, 133.8, 134.3, 134.4, 134.6 (C<sub>o</sub>-Ph), 136.7 (C-2''), 142.2 (C-2), 142.5, 142.6, 142.7 (C-1), 145.6 (C-1''), 150.2, 150.4, 150.5, 150.6, 150.7, 150.9 (C-10, C-11, C-14, C-15), 152.7 (C-6a'), 161.8 (C-10b'), 162.4 (C-5'). UV/vis (CHCl<sub>3</sub>): λ<sub>max</sub> (log ε): 422 (5.75), 548 (4.60), 593 (4.51) nm. HRMS (ESI<sup>+</sup>): *m/z* [M+H]<sup>+</sup> calcd. for C<sub>62</sub>H<sub>39</sub>ClN<sub>4</sub>O<sub>3</sub>Zn: 987.2002; found: 987.2006.

RMN <sup>1</sup>H:

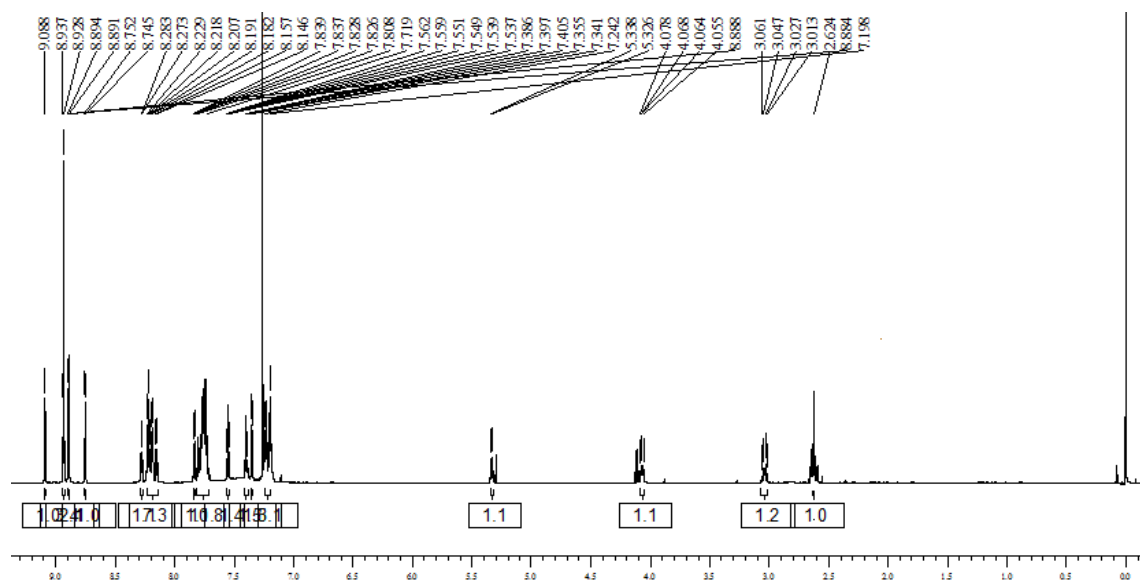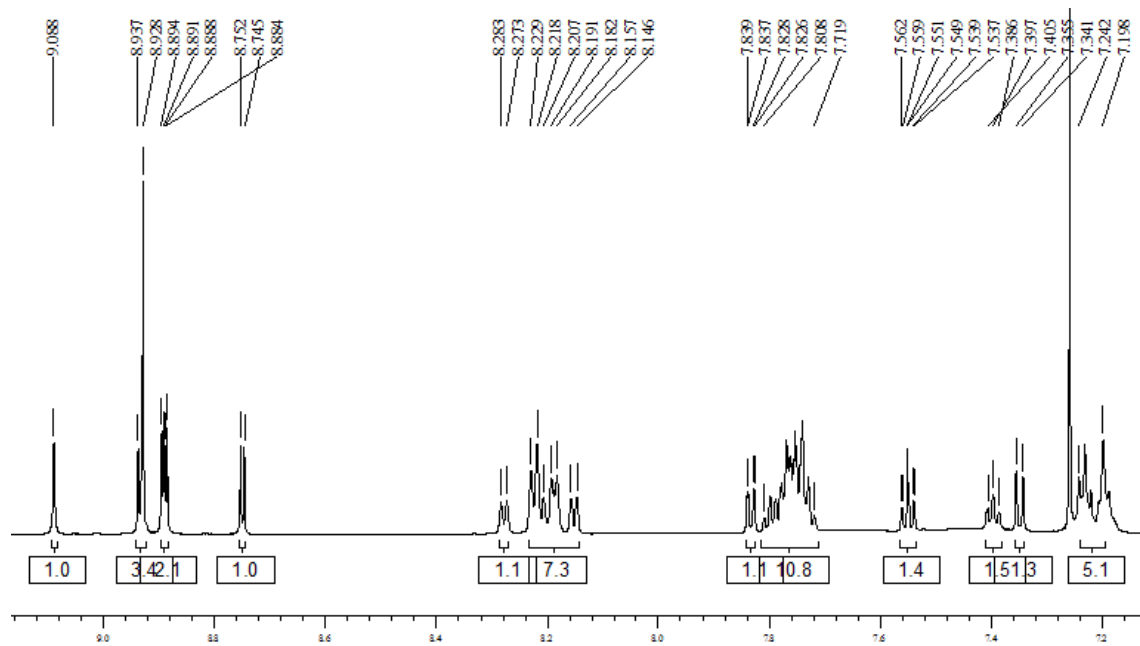

RMN  $^{13}\text{C}$ :

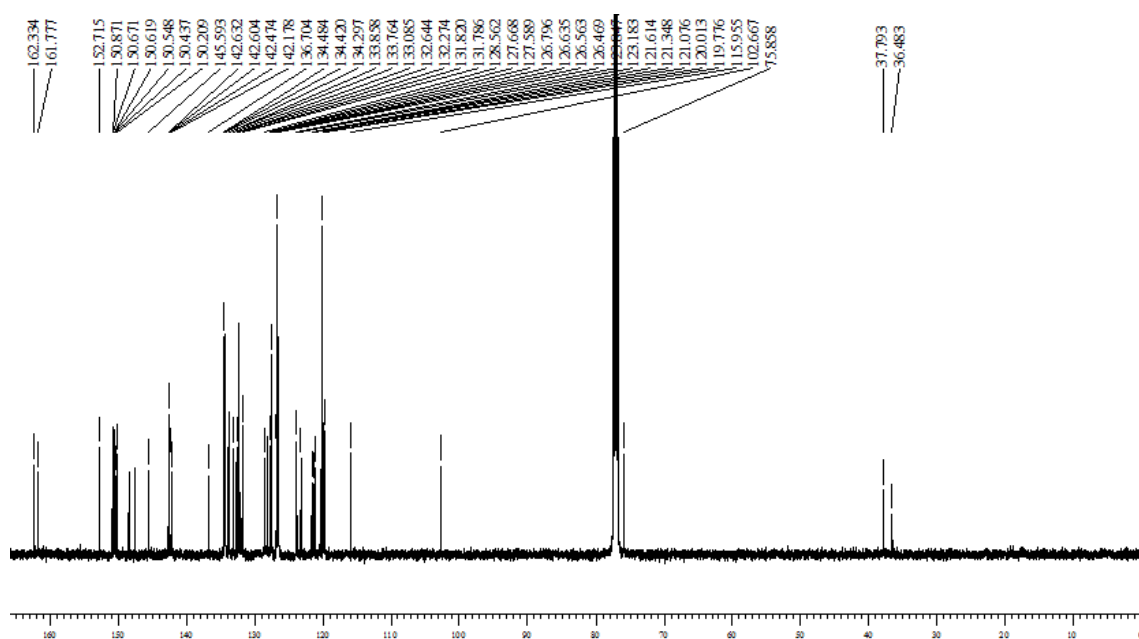

HRMS (ESI $^{+}$ ):

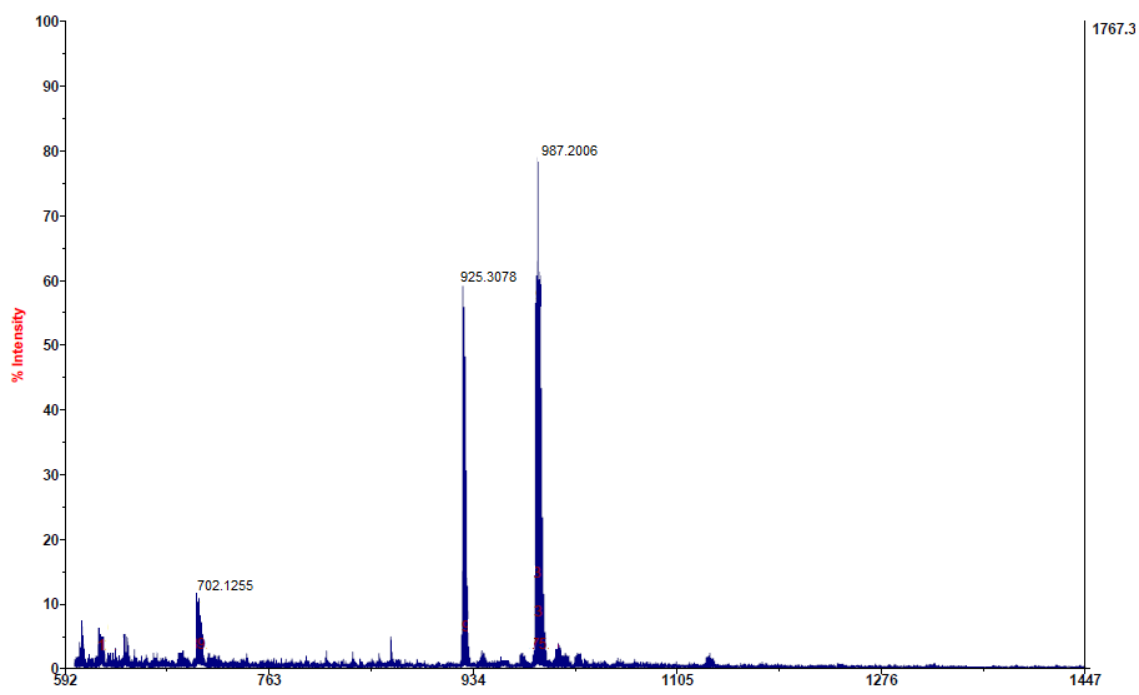

**{2-(4-(2-Chlorophenyl)-5-oxo-2,3,4,5-tetrahydro-2*H*-pyrano[3,2-*c*]chromen-2-yl)-5,10,15,20-tetraphenylporphyrinato}zinc(II) (6c.2)**

$^1\text{H}$  NMR (500 MHz,  $\text{CDCl}_3$ ):  $\delta$  = 2.67 (dd,  $J$  14.4, 11.1 Hz, 1H, H-3'), 3.56-3.61 (m, 1H, H-3'), 4.22 (d,  $J$  5.9 Hz, 1H, H-4'), 5.05 (br d,  $J$  11.1 Hz, 1H, H-2'), 7.16–7.30 (m, 5H, H-3'',4'',5'',6'', H-9'), 7.36 (d,  $J$  8.3 Hz, 1H, H-7'), 7.41-7.47 (m, 1H, *p*-Ph-20), 7.53 (ddd,  $J$  8.3, 7.0, 1.5 Hz, 1H, H-8'), 7.70-7.80 (m, 12H, 11H-*m,p*-Ph, H-10'), 8.16-8.25

(m, 7H, *o*-Ph), 8.25-8.28 (m, 1H, *o*-Ph-20), 8.76 (d, *J* 4.7 Hz, 1H, H<sub>β</sub>), 8.91 (d, *J* 4.7 Hz, 1H, H<sub>β</sub>), 8.95 (s, 3H, H<sub>β</sub>, H-12 and H-13), 8.97 (d, *J* 4.7 Hz, 1H, H<sub>β</sub>), 9.15 (s, 1H, H-3). <sup>13</sup>C NMR (75 MHz, CDCl<sub>3</sub>): δ = 31.9 (C-4'), 36.5 (C-3'), 76.4 (C-2'), 101.0 (C-4a'), 116.5 (C-10a'), 119.4 (C-5''), 120.2 (C-7'), 121.3, 121.4 (C-3'' and C-6''), 123.3 (C-10'), 126.3, 126.4, 126.5 (*Cm,p*-Ph), 127.2, 127.4 (C-4''), 128.4 (C-9'), 130.6, 130.7 (C-8'), 132.3, 132.4, 132.5 (C<sub>β</sub>), 134.4, 134.5, 134.6, 134.8 (*Co*-Ph), 136.0 (C-2''), 141.4 (C-2), 142.6, 142.7 (C-1), 145.1 (C-1''), 150.0, 150.1, 150.4, 150.5, (C-10, C-11, C-14, C-15), 151.2 (C-6a'), 161.3 (C-10b'), 162.6 (C-5'). UV/vis (CHCl<sub>3</sub>): λ<sub>max</sub> (log ε): 421 (5.73), 547 (4.60), 591 (4.50) nm. HRMS (ESI<sup>+</sup>): *m/z* [M+H]<sup>+</sup> calcd. for C<sub>62</sub>H<sub>39</sub>ClN<sub>4</sub>O<sub>3</sub>Zn: 987.2002; found: 987.2004.

RMN <sup>1</sup>H:

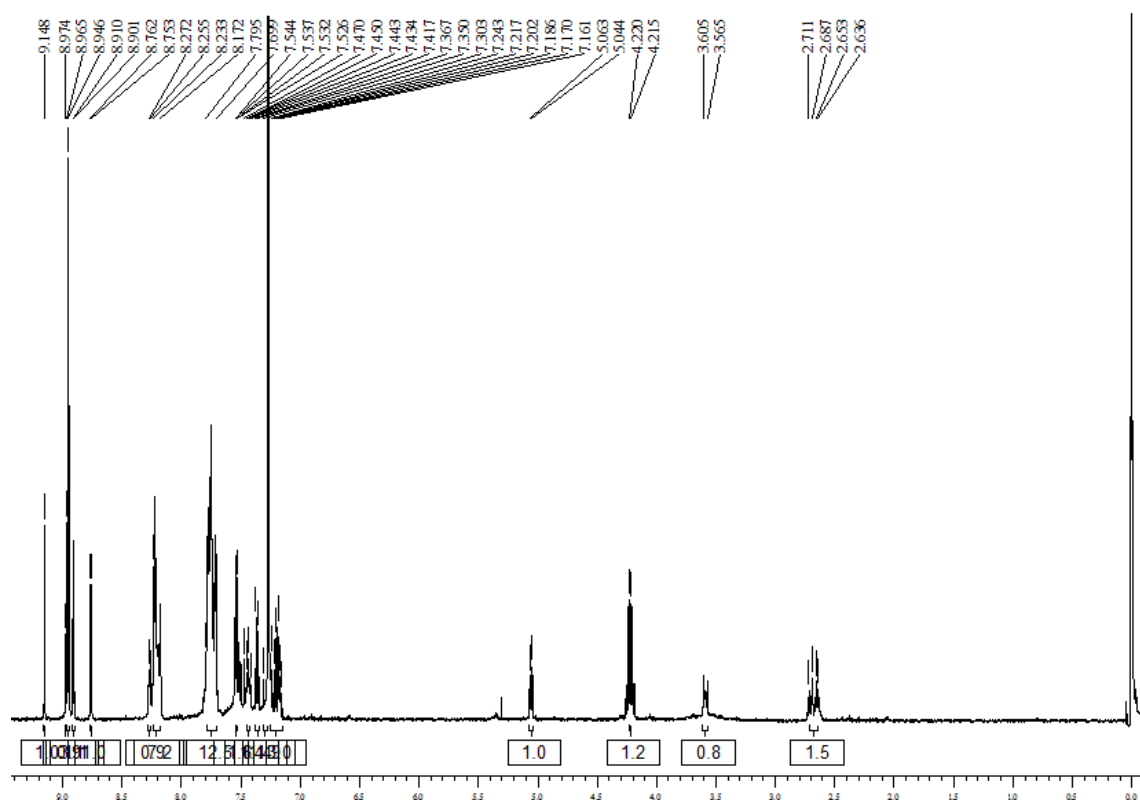

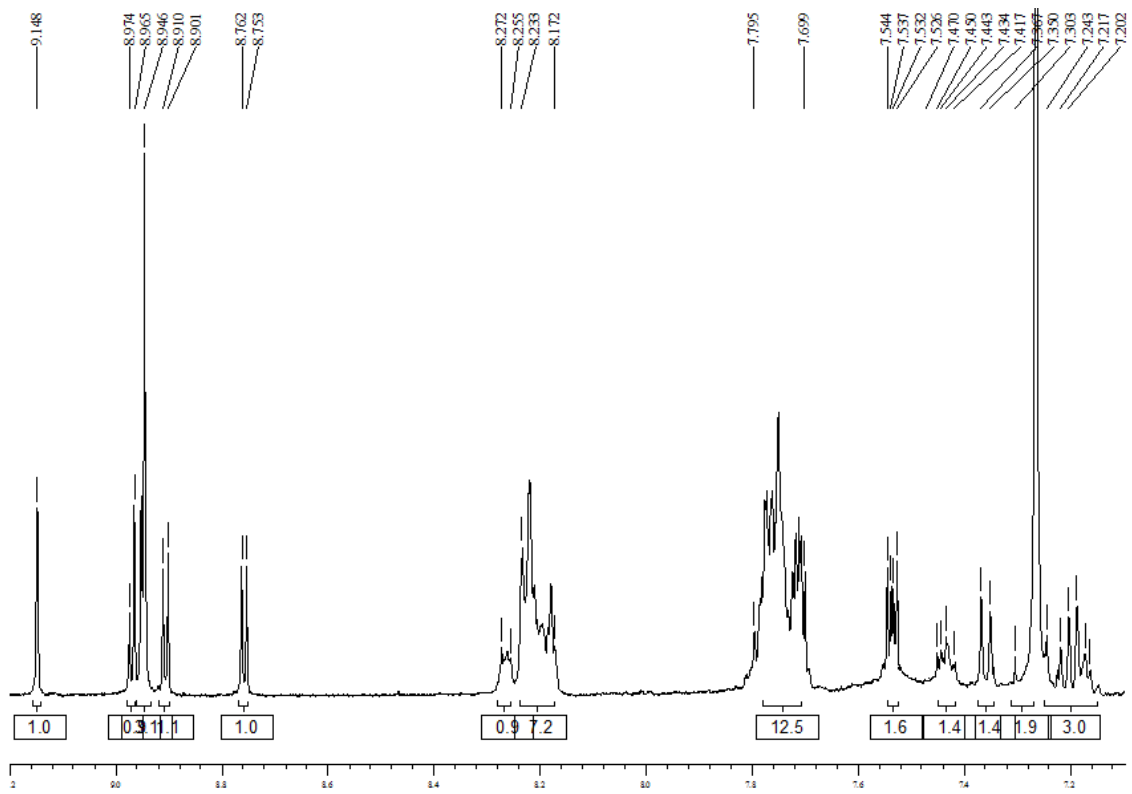

RMN <sup>13</sup>C:

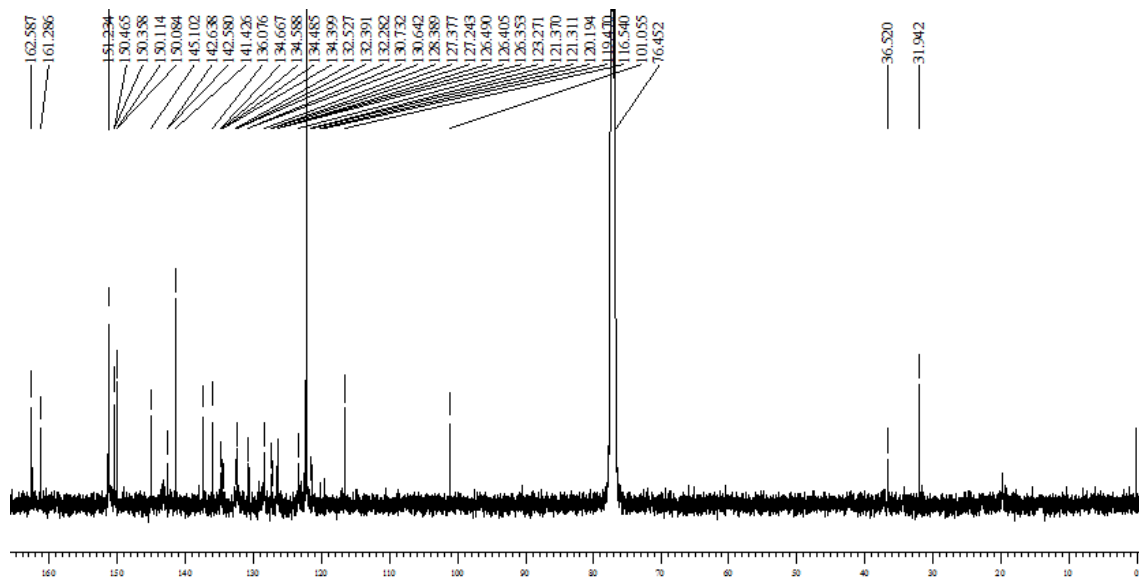



HRMS (ESI<sup>+</sup>):

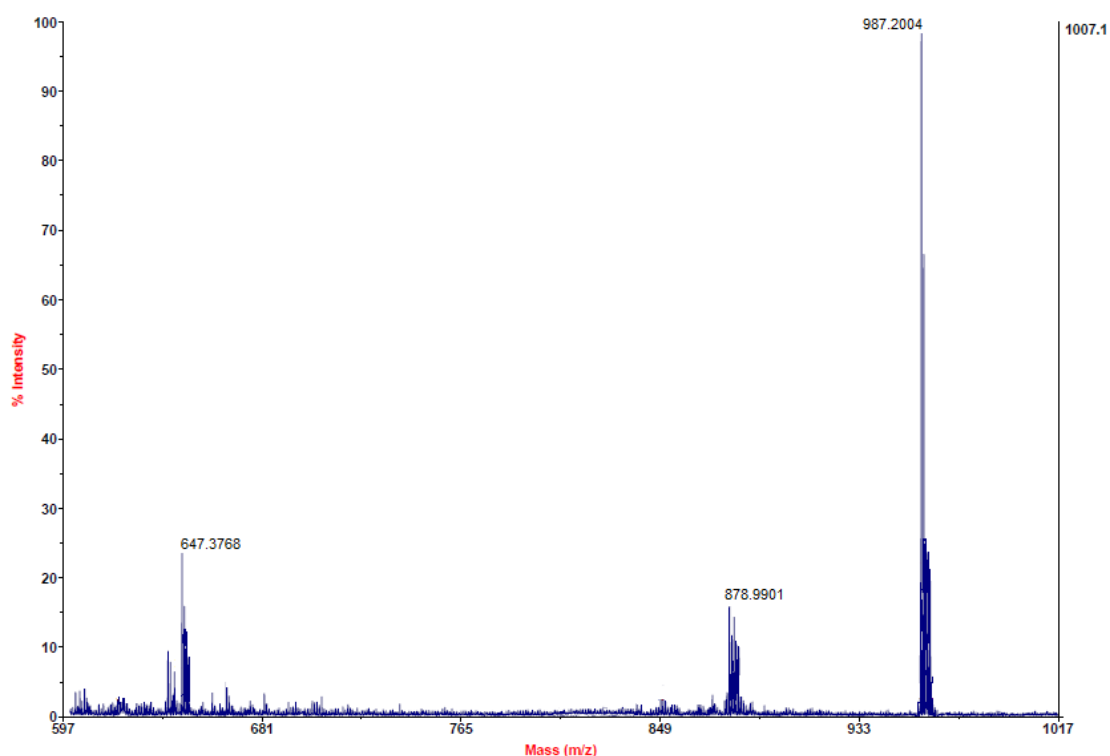

**{2-(4-(5-Nitrothiophen-2-yl)-5-oxo-2,3,4,5-tetrahydro-2H-pyrano[3,2-c]chromen-2-yl)-5,10,15,20-tetraphenylporphyrinato}zinc(II) (6d.1)**

<sup>1</sup>H NMR (500 MHz, CDCl<sub>3</sub>): δ = 2.51 (dt, *J* 13.6, 11.2 Hz, 1 H, H-3'), 3.03 (ddd, *J* 13.6, 6.4, 1.5 Hz, 1 H, H-3'), 4.05 (dd, *J* 11.2, 6.4 Hz, 1H, H-4'), 5.31 (br d, *J* 13.6 Hz, 1H, H-2'), 6.90 (d, *J* 4.3 Hz, 1H, H-2''), 7.23–7.28 (m, 1H, H-9'), 7.38 (d, *J* 8.5 Hz, 1H, H-7'), 7.41-7.43 (m, 1H, *m,p*-Ph-20), 7.58 (ddd, *J* 8.5, 7.2, 1.5 Hz, 1H, H-8'), 7.69 (d, *J* 4.3 Hz, 1H, H-3''), 7.73-7.81 (m, 11H, *m,p*-Ph), 7.82 (dd, *J* 8.1, 1.5 Hz, 1H, H-10'), 8.17-8.23 (m, 7H, *o*-Ph), 8.27-8.29 (m, 1H, *o*-Ph), 8.73 (d, *J* 4.6 Hz, 1H, H<sub>β</sub>), 8.90 (d, *J* 4.6 Hz, 1H, H<sub>β</sub>), 8.93 (d, *J* 4.6 Hz, 1H, H<sub>β</sub>), 8.94 (s, 2H, H-12 and H-13), 8.97 (d, *J* 4.6 Hz, 1H, H<sub>β</sub>), 9.18 (s, 1H, H-3). <sup>13</sup>C NMR (75 MHz, CDCl<sub>3</sub>): δ = 36.1 (C-4'), 42.1 (C-3'), 76.1 (C-2'), 102.7 (C-4a'), 115.4 (C-10a'), 116.8 (C-7'), 123.2 (C-10'), 124.0 (C-2''), 126.5, 126.6, 126.7, 127.7, 127.8 (*Cm,p*-Ph), 127.0 (C-9'), 128.7, 128.8 (C-3''), 131.9, 132.4, 132.5, 132.6 (C-8', C<sub>β</sub>), 133.7, 134.3, 134.4, 134.5 (C<sub>o</sub>-Ph), 141.3 (C-2), 142.4, 142.6 (C-1), 149.1 (C-1''), 152.9 (C-6a'), 156.1 (C-4''), 161.1 (C-10b'), 162.8 (C-5'). UV/vis (CHCl<sub>3</sub>): λ<sub>max</sub> (log ε): 420 (5.72), 547 (4.59), 596 (4.50) nm. HRMS (ESI<sup>+</sup>): *m/z* [M+H]<sup>+</sup> calcd. for C<sub>60</sub>H<sub>37</sub>N<sub>5</sub>O<sub>5</sub>SZn: 1004.1807; found: 1004.1801.

RMN <sup>1</sup>H:

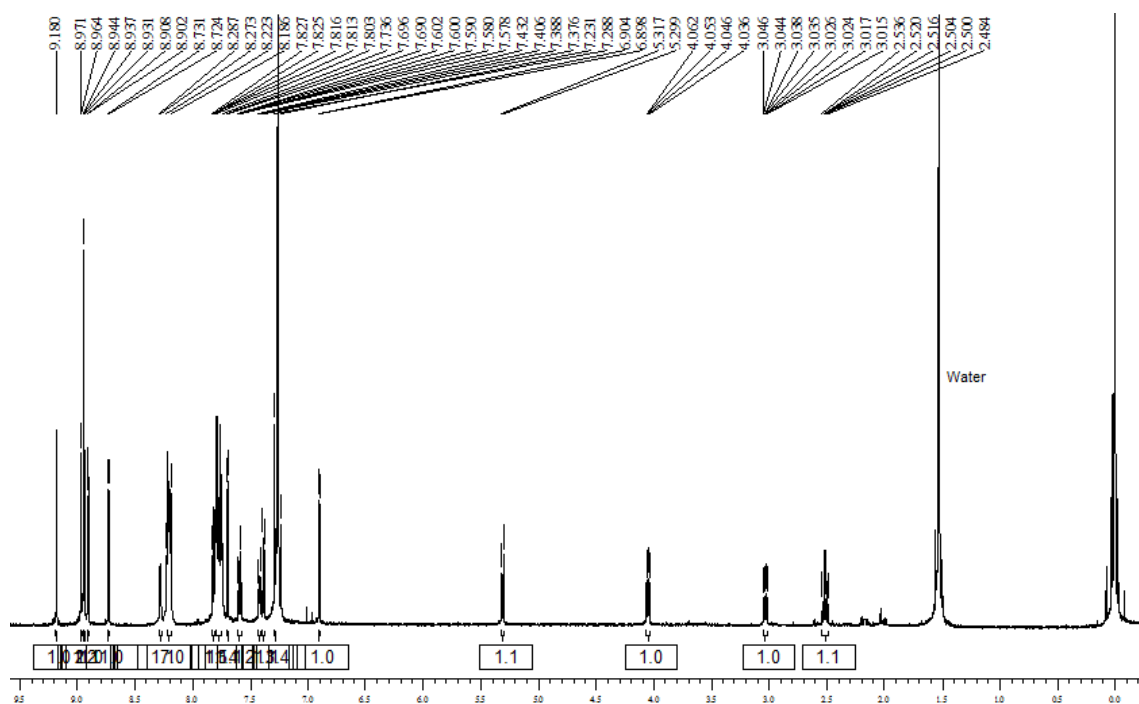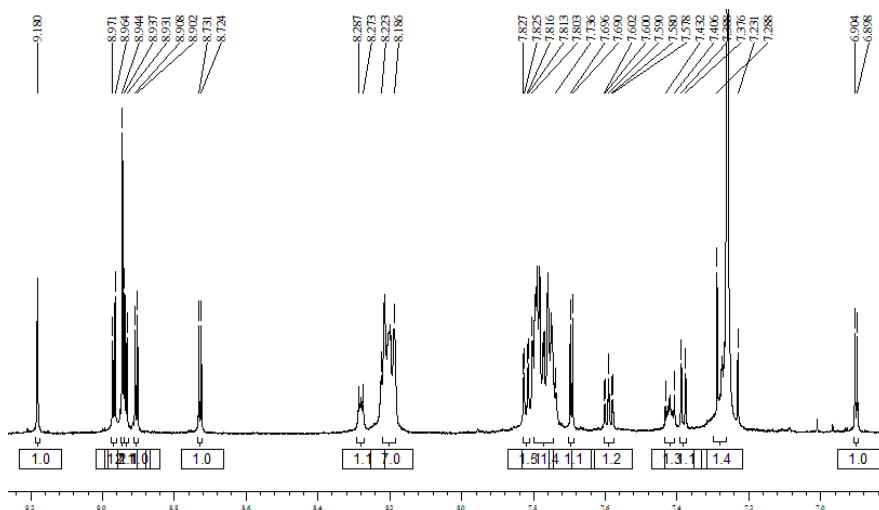

RMN <sup>13</sup>C:

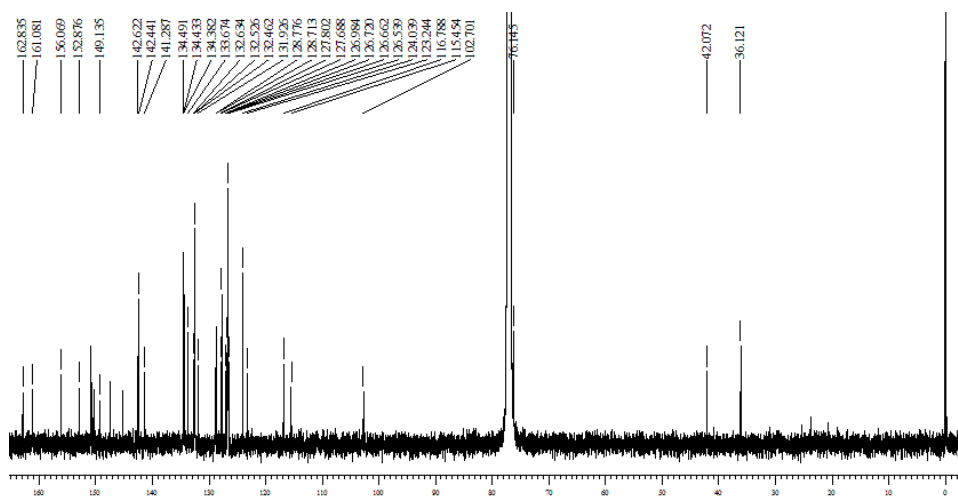

HRMS (ESI<sup>+</sup>):

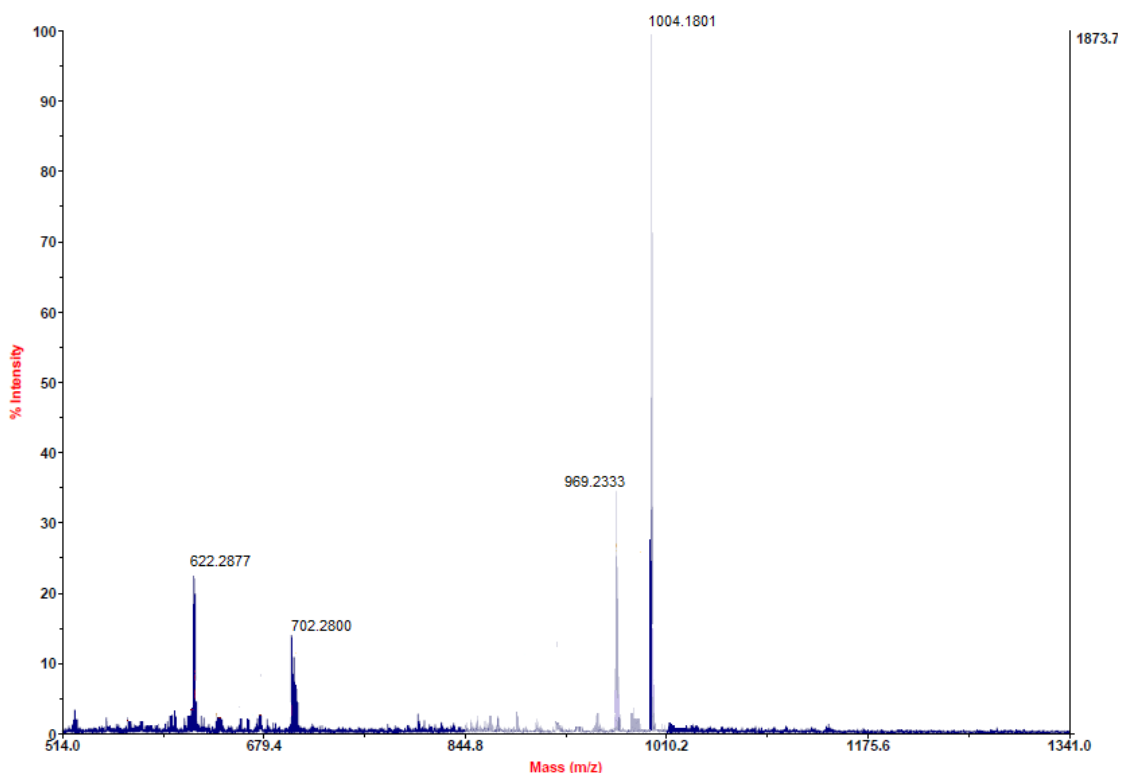

**{2-(4-(5-Nitrothiophen-2-yl)-5-oxo-2,3,4,5-tetrahydro-2H-pyrano[3,2-c]chromen-2-yl)-5,10,15,20-tetraphenylporphyrinato}zinc(II) (6d.2)**

<sup>1</sup>H NMR (500 MHz, CDCl<sub>3</sub>): δ = 2.88 (dt, *J* 14.0, 11.8 Hz, 1 H, H-3'), 3.17-3.21 (m, 1 H, H-3'), 4.53 (d, *J* 5.3 Hz, 1H, H-4'), 5.31 (dd, *J* 11.8, 1.5 Hz, 1H, H-2'), 6.70 (dd, *J* 4.2, 0.7 Hz, 1H, H-2''), 7.29–7.32 (m, 1H, H-9'), 7.39 (dd, *J* 8.3, 0.5 Hz, 1H, H-7'), 7.51-7.52 (m, 1H, *m,p*-Ph-20), 7.54 (ddd, *J* 8.3, 7.1, 1.4 Hz, 1H, H-8'), 7.72-7.79 (m, 11H, *m,p*-Ph), 7.85 (d, *J* 7.5 Hz, 1H, H-10'), 7.89 (d, *J* 4.2 Hz, 1H, H-3''), 8.17-8.23 (m, 7H, *o*-Ph), 8.34-8.36 (m, 1H, *o*-Ph), 8.57 (d, *J* 4.7 Hz, 1H, H<sub>β</sub>), 8.86 (d, *J* 4.7 Hz, 1H, H<sub>β</sub>), 8.92 (d, *J* 4.7 Hz, 1H, H<sub>β</sub>), 8.93 (s, 2H, H-12 and H-13), 8.96 (d, *J* 4.7 Hz, 1H, H<sub>β</sub>), 9.16 (s, 1H, H-3). <sup>13</sup>C NMR (75 MHz, CDCl<sub>3</sub>): δ = 32.7 (C-4'), 35.2 (C-3'), 69.9 (C-2'), 100.4 (C-4a'), 115.1 (C-10a'), 116.9 (C-7'), 123.3 (C-10'), 123.9 (C-2''), 126.3, 126.6, 127.7, 127.8 (*Cm,p*-Ph), 126.5 (C-9'), 128.5, 128.8 (C-3''), 131.8, 132.4, 132.5, 132.9 (C-8', C<sub>β</sub>), 133.5, 134.3, 134.4 (C<sub>o</sub>-Ph), 141.7 (C-2), 142.4, 142.7 (C-1), 147.0 (C-1''), 152.9 (C-6a'), 156.0 (C-4''), 161.6 (C-10b'), 162.2 (C-5'). UV/vis (CHCl<sub>3</sub>): λ<sub>max</sub> (log ε): 422 (5.71), 547 (4.60), 595 (4.50) nm. HRMS (ESI<sup>+</sup>): *m/z* [M+H]<sup>+</sup> calcd. for C<sub>60</sub>H<sub>37</sub>N<sub>5</sub>O<sub>5</sub>SZn: 1004.1807; found: 1004.1804.

RMN <sup>1</sup>H:

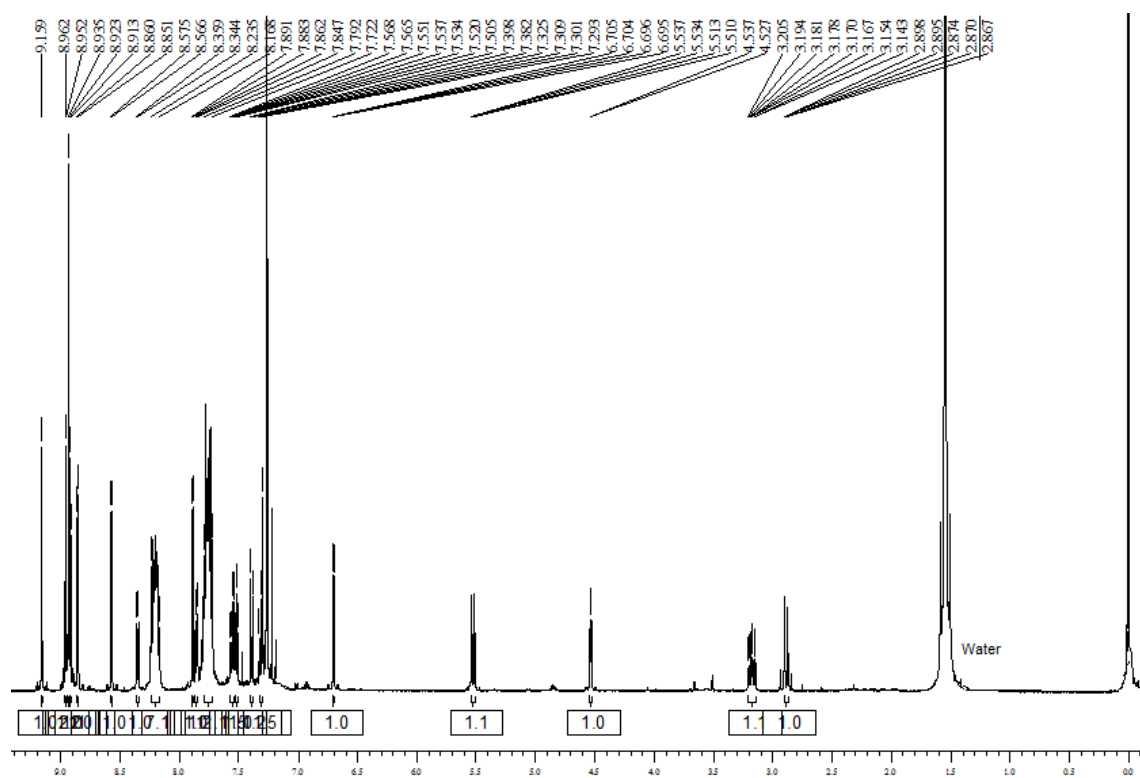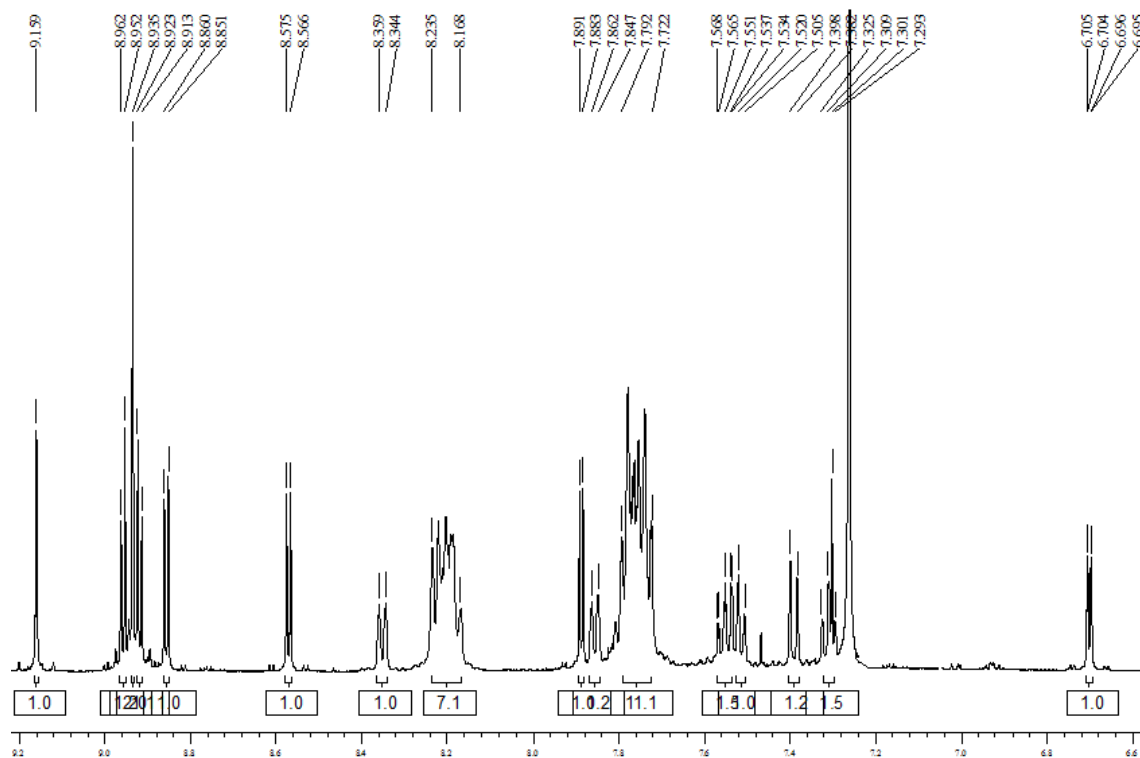

RMN  $^{13}\text{C}$ :

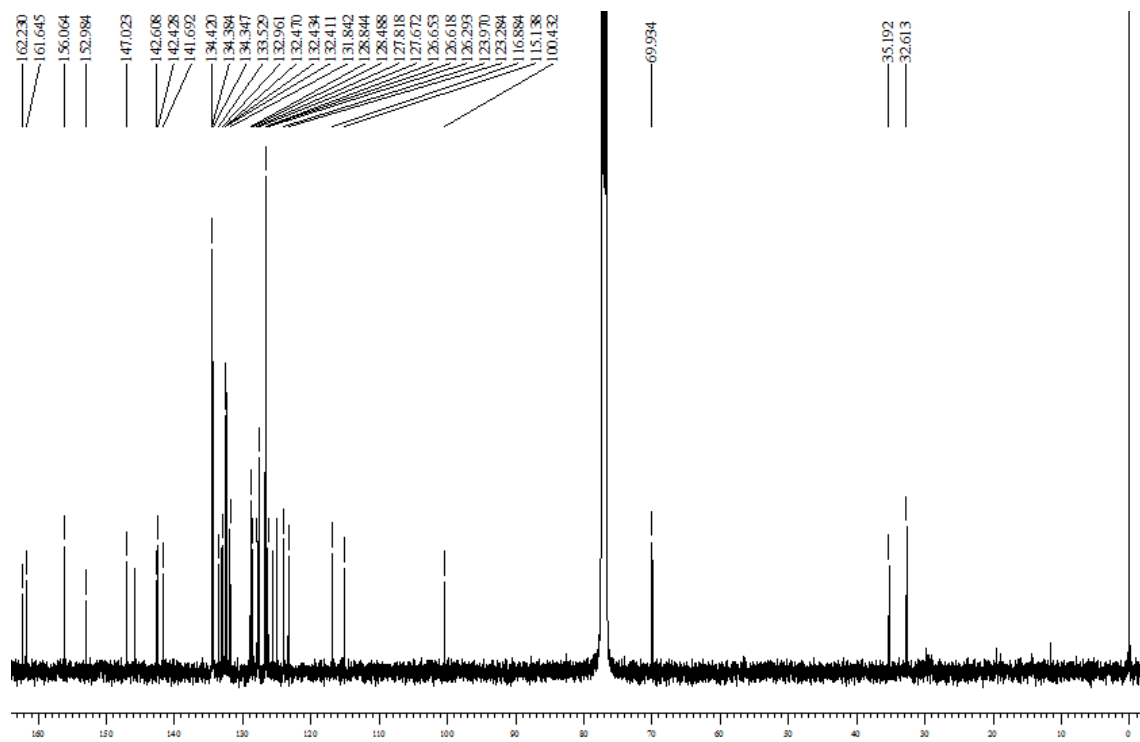

HRMS (ESI $^{+}$ ):

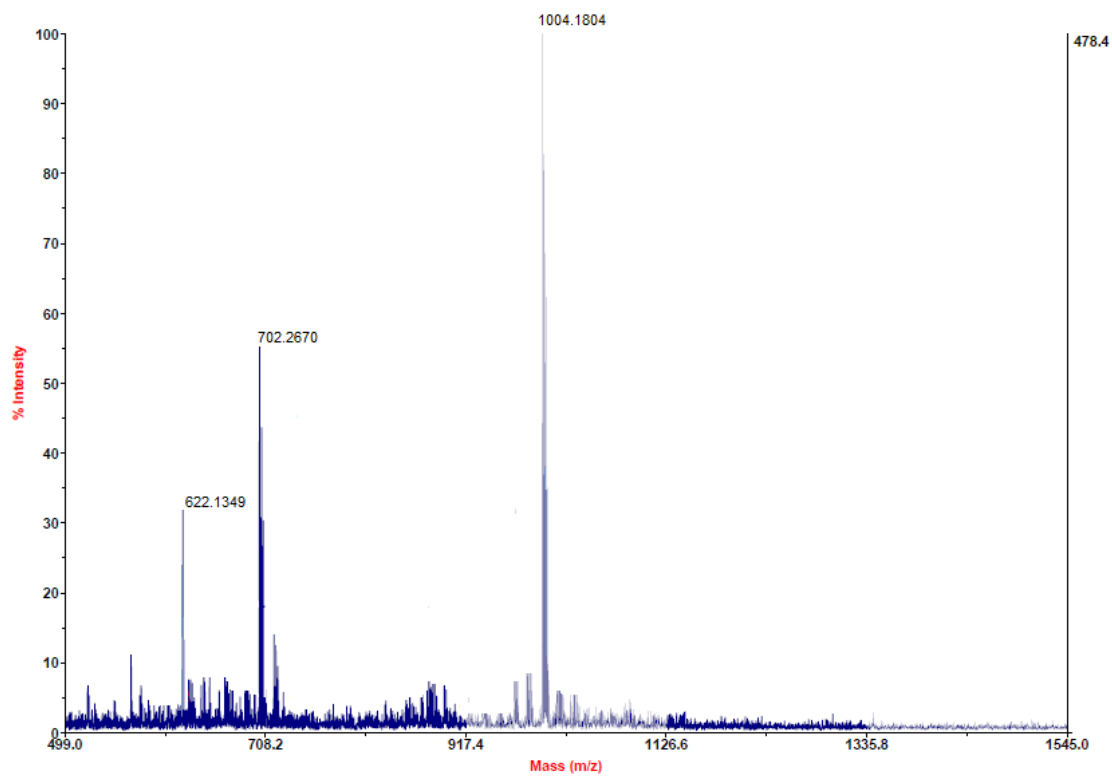

**{2-(4-(4-Pyridinyl)-5-oxo-2,3,4,5-tetrahydro-2H-pyrano[3,2-c]chromen-2-yl)**

**5,10,15,20-tetraphenylporphyrinato}zinc(II) (6e.1)**

$^1\text{H}$  NMR (500 MHz,  $\text{CDCl}_3$ ):  $\delta$  = 2.36 (dt,  $J$  14.2, 11.6 Hz, 1H, H-3'), 2.92 (ddd,  $J$  14.2, 6.4, 1.4 Hz, 1H, H-3'), 3.91 (dd,  $J$  11.6, 6.4 Hz, 1H, H-4'), 5.31 (br d,  $J$  11.6 Hz, 1H, H-2'), 7.22–7.30 (m, 1H, H-9'), 7.37 (dd,  $J$  8.4, 0.6 Hz, 1H, H-7'), 7.42 (dd,  $J$  8.9, 1.9 Hz, 2H, H-2'',6''), 7.43–7.45 (m, 1H, *p*-Ph-20), 7.58 (ddd,  $J$  8.4, 7.3, 1.6 Hz, 1H, H-8'), 7.73–7.85 (m, 12H, 11H *m,p*-Ph, H-10'), 8.14 (dd,  $J$  8.9, 1.9 Hz, 2H, H-3'',5''), 8.18–8.23 (m, 7H, *o*-Ph), 8.27–8.31 (m, 1H, *o*-Ph), 8.74 (d,  $J$  4.7 Hz, 1H, H $_{\beta}$ ), 8.91 (d,  $J$  4.7 Hz, 1H, H $_{\beta}$ ), 8.92 (d,  $J$  4.7 Hz, 1H, H $_{\beta}$ ), 8.94 (s, 2H, H-12 and H-13), 8.96 (d,  $J$  4.7 Hz, 1H, H $_{\beta}$ ), 9.18 (s, 1H, H-3).  $^{13}\text{C}$  NMR (75 MHz,  $\text{CDCl}_3$ ):  $\delta$  = 40.1 (C-4'), 41.6 (C-3'), 76.2 (C-2'), 103.3 (C-4a'), 115.6 (C-10a'), 120.1 (C-7'), 121.2, 121.5, 121.8 (C-2'',6''), 123.9, 124.1 (C-10'), 126.5, 126.6, 126.7, 126.9, 127.6, 127.7 (*Cm,p*-Ph), 128.7 (C-9'), 131.8, 132.1 (C-8'), 132.3, 132.4, 132.5, 132.6 (C $_{\beta}$ ), 134.3, 134.4, 134.5 (*Co*-Ph), 142.4 (C-2), 142.7 (C-1), 145.3 (C-1'), 150.3, 150.5, 150.6, 150.7, 150.8, 150.9 (C-10, C-11, C-14, C-15), 151.2 (C-3'',5''), 152.8 (C-6a'), 161.4 (C-10b'), 163.0 (C-5'). UV/vis ( $\text{CHCl}_3$ ):  $\lambda_{\text{max}}$  (log  $\epsilon$ ): 422 (4.95), 544 (4.56) nm. HRMS (ESI $^+$ ):  $m/z$  [M+H] $^+$  calcd. for  $\text{C}_{61}\text{H}_{39}\text{N}_5\text{O}_3\text{Zn}$ : 954.2344; found: 954.2349.

RMN  $^1\text{H}$ :

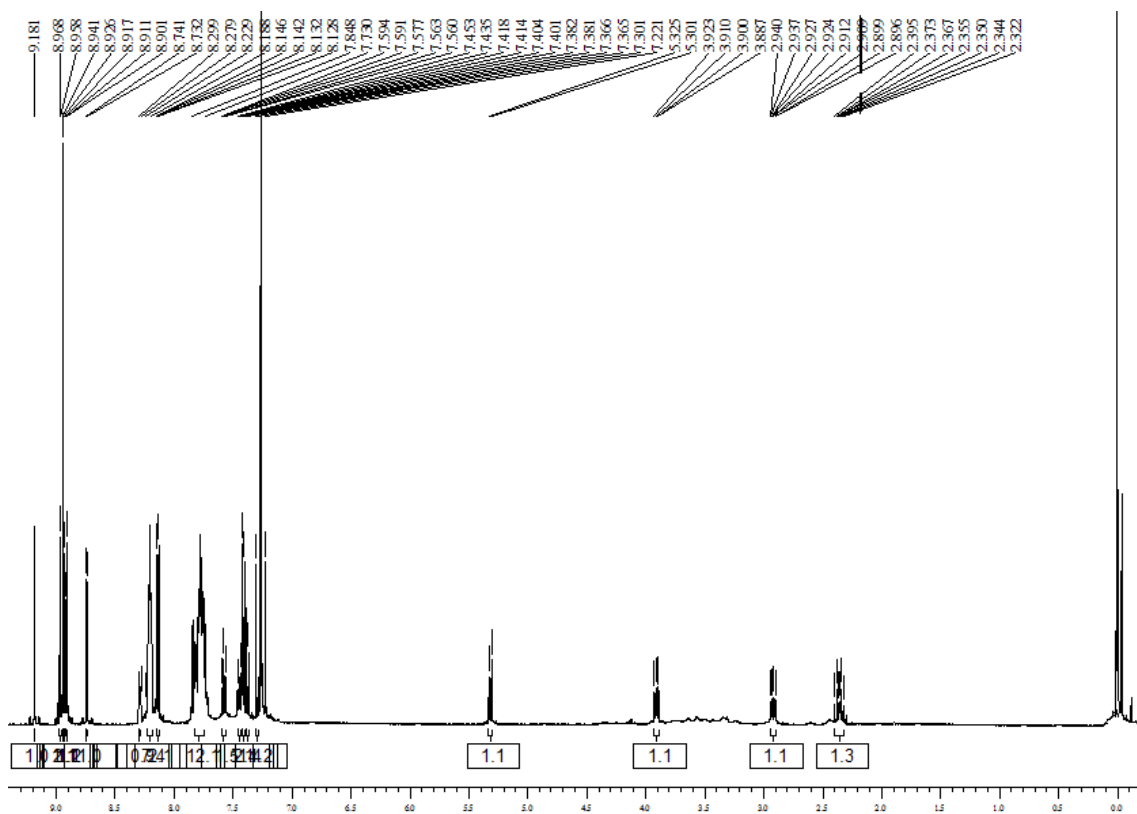

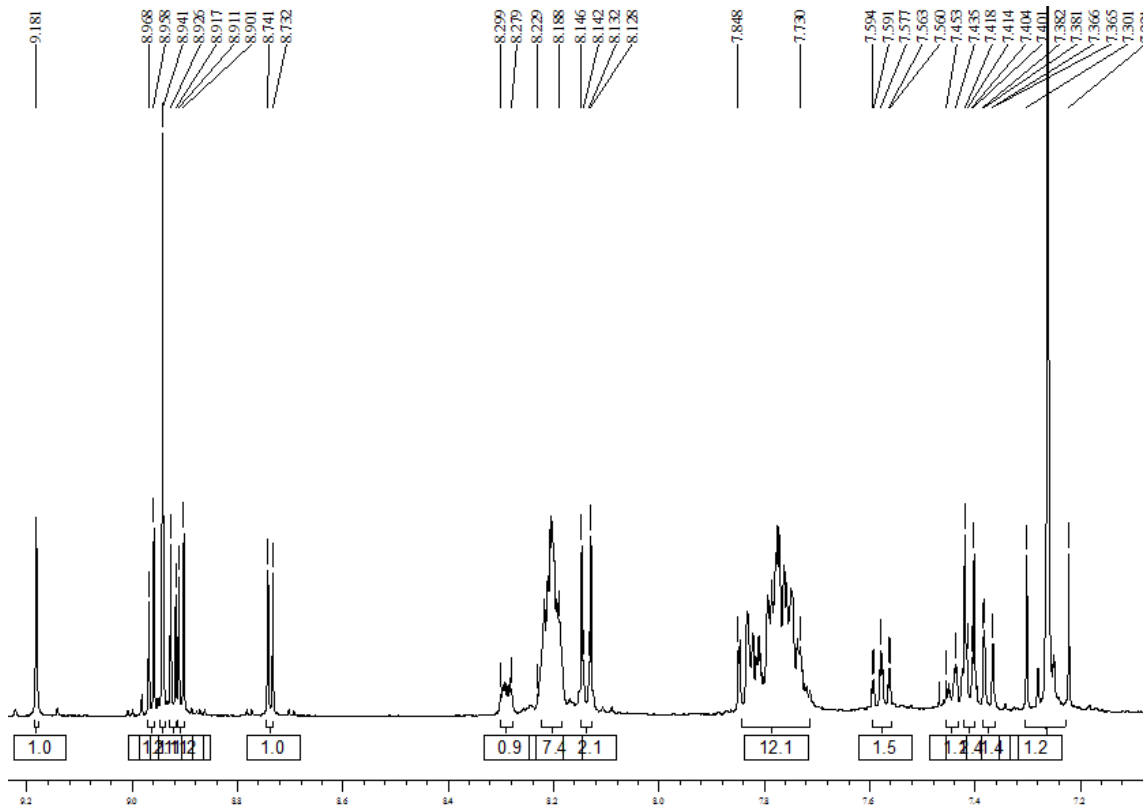

RMN <sup>13</sup>C:

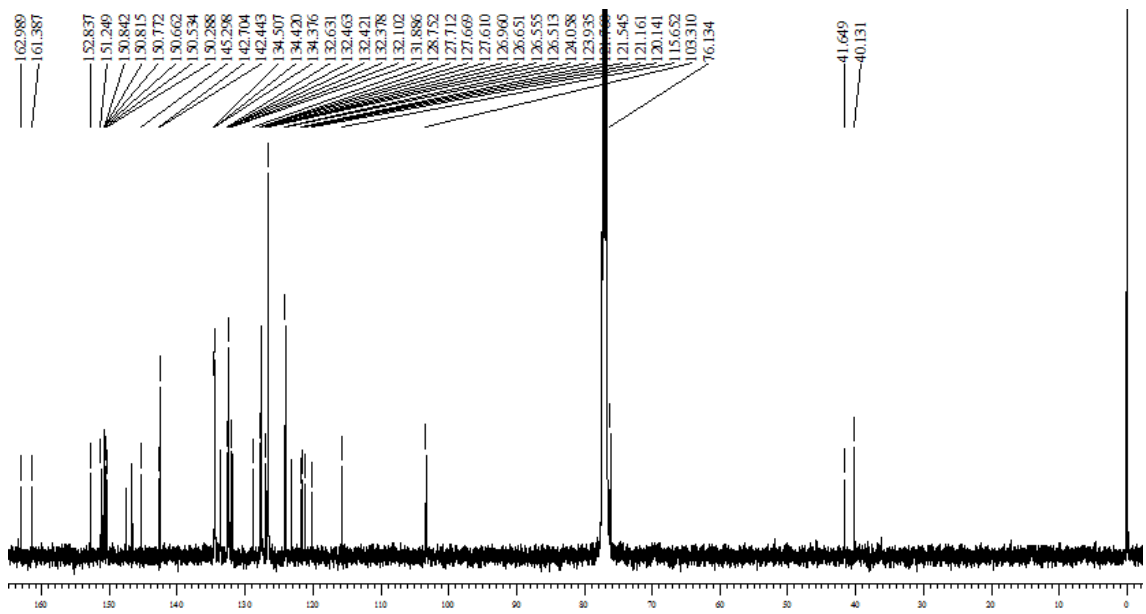

HRMS (ESI<sup>+</sup>):

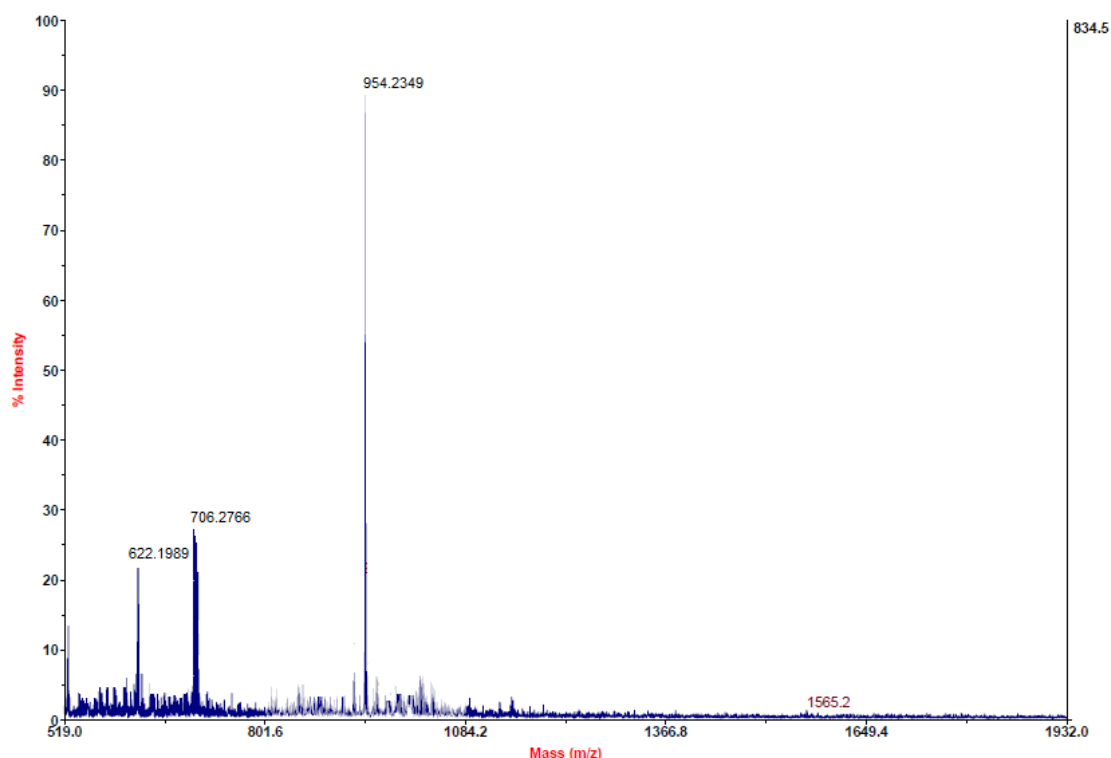

**{2-(4-(4-Pyridinyl)-5-oxo-2,3,4,5-tetrahydro-2H-pyrano[3,2-c]chromen-2-yl)  
5,10,15,20-tetraphenylporphyrinato}zinc(II) (6e.2)**

<sup>1</sup>H NMR (500 MHz, CDCl<sub>3</sub>): δ = 2.78 (dd, *J* 14.5, 11.0 Hz, 1H, H-3'), 3.24 (m, 1H, H-3'), 4.42 (d, *J* 5.4 Hz, 1H, H-4'), 5.41 (dd, *J* 11.0, 1.5 Hz, 1H, H-2'), 7.22 (dd, *J* 8.7, 1.8 Hz, 2H, H-2'',6''), 7.34–7.38 (m, 1H, H-9'), 7.40 (dd, *J* 8.4, 0.8 Hz, 1H, H-7'), 7.53–7.57 (m, 1H, *m,p*-Ph-20), 7.62 (ddd, *J* 8.4, 7.1, 1.3 Hz, 1H, H-8'), 7.72–7.80 (m, 12H, 11H *m,p*-Ph and H-10'), 8.17–8.23 (m, 7H, *o*-Ph), 8.25 (dd, *J* 8.7, 1.8 Hz, 2H, H-3'',5''), 8.38–8.41 (m, 1H, *o*-Ph), 8.54 (d, *J* 4.7 Hz, 1H, H<sub>β</sub>), 8.85 (d, *J* 4.7 Hz, 1H, H<sub>β</sub>), 8.91 (d, *J* 4.7 Hz, 1H, H<sub>β</sub>), 8.93 (s, 2H, H-12 and H-13), 8.95 (d, *J* 4.7 Hz, 1H, H<sub>β</sub>), 9.15 (s, 1H, H-3). <sup>13</sup>C NMR (75 MHz, CDCl<sub>3</sub>): δ = 29.7 (C-4'), 30.9 (C-3'), 69.2 (C-2'), 100.6 (C-4a'), 115.3 (C-10a'), 116.8 (C-7'), 121.3, 121.5, 121.7 (C-2'',6''), 123.8, 123.9 (C-10'), 126.5, 126.6, 126.7, 127.7, 127.8 (*Cm,p*-Ph), 129.0 (C-9'), 131.8, 132.1 (C-8'), 132.3, 132.4, 132.9, 133.1, 133.4 (C<sub>β</sub>), 134.3, 134.4, 134.7 (C<sub>o</sub>-Ph), 142.4 (C-2), 142.6 (C-1), 145.9 (C-1''), 150.1, 150.6, 150.7, 150.8 (C-10, C-11, C-14, C-15), 151.3 (C-3'',5''), 152.9 (C-6a'), 161.9 (C-10b'), 162.3 (C-5'). UV/vis (CHCl<sub>3</sub>): λ<sub>max</sub> (log ε): 423 (4.95), 545 (4.55) nm. HRMS (ESI<sup>+</sup>): *m/z* [M+H]<sup>+</sup> calcd. for C<sub>61</sub>H<sub>39</sub>N<sub>5</sub>O<sub>3</sub>Zn: 954.2344; found: 954.2345.





RMN 13C:

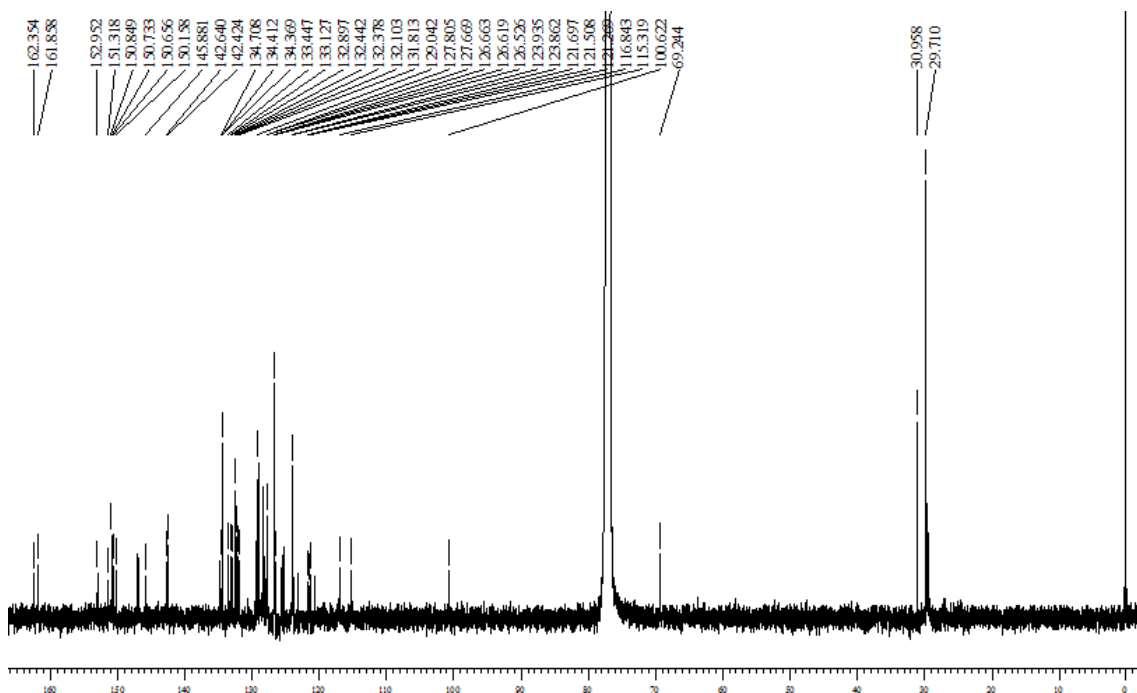

HRMS (ESI<sup>+</sup>):

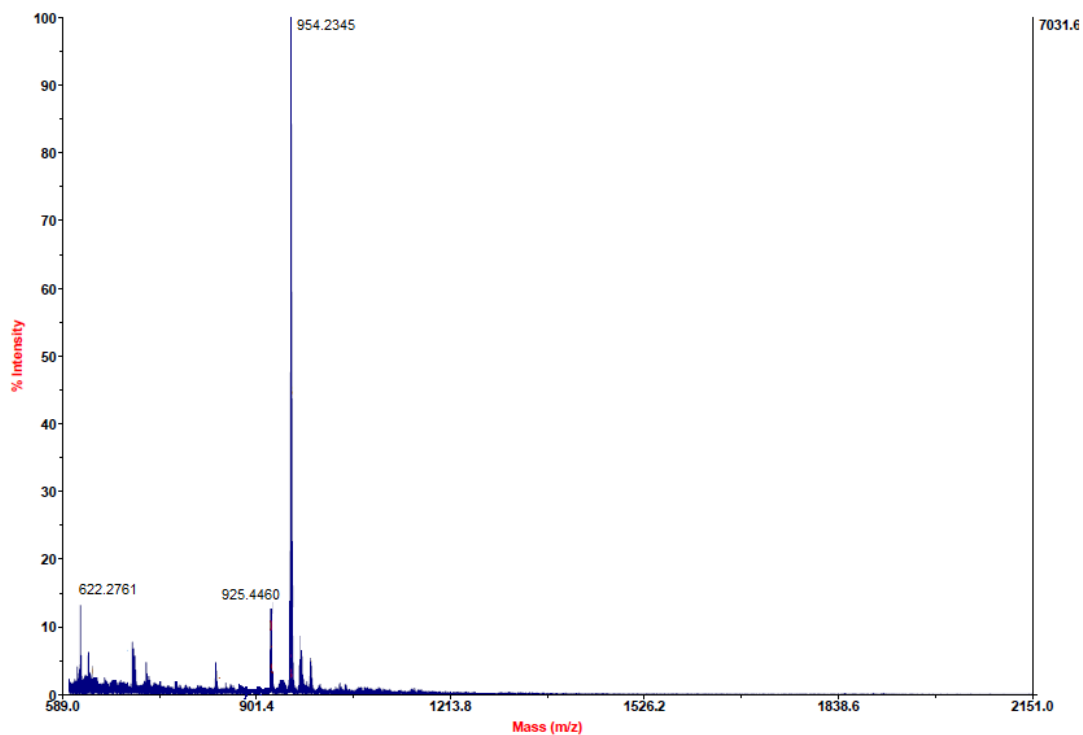

**{2-(4-(3-Bromophenyl)-5-oxo-2,3,4,5-tetrahydro-2H-pyrano[3,2-c]chromen-2-yl)-5,10,15,20-tetraphenylporphyrinato}zinc(II) (6f.1)**

<sup>1</sup>H NMR (500 MHz, CDCl<sub>3</sub>): δ = 2.93 (dd, *J* 14.3, 11.5 Hz, 1 H, H-3'), 3.82 (dd, *J* 14.3, 6.5 Hz, 1 H, H-3'), 4.00-4.10 (m, 1H, H-4'), 5.24 (br d, *J* 11.5 Hz, 1H, H-2'), 7.14–7.23

(m, 3H, H-5'', H-6'' and H-9'), 7.35 (d,  $J$  8.1 Hz, 1H, H-7'), 7.38-7.42 (m, 1H, *m,p*-Ph-20), 7.54 (t,  $J$  8.1 Hz, 1H, H-8'), 7.59-7.63 (m, 2H, H-2'' and H-4''), 7.71-7.83 (m, 12H, 11H *m,p*-Ph and H-10'), 8.15-8.25 (m, 7H, *o*-Ph), 8.25-8.31 (m, 1H, *o*-Ph), 8.74 (d,  $J$  4.7 Hz, 1H, H $_{\beta}$ ), 8.90 (d,  $J$  4.7 Hz, 1H, H $_{\beta}$ ), 8.92 (d,  $J$  4.7 Hz, 1H, H $_{\beta}$ ), 8.94 (s, 2H, H-12 and H-13), 8.96 (d,  $J$  4.7 Hz, 1H, H $_{\beta}$ ), 9.18 (s, 1H $_{\beta}$ , H-3).  $^{13}\text{C}$  NMR (75 MHz,  $\text{CDCl}_3$ ):  $\delta$  = 39.9 (C-4'), 42.0 (C-3'), 74.6 (C-2'), 103.7 (C-4a'), 115.4 (C-10a'), 116.7 (C-7'), 121.7, 122.0, 123.7, 123.9 (C-2'' and C-6''), 122.7, 122.9 (C-10'), 125.3 (C-4''), 126.5, 126.6, 126.8, 127.0 (*Cm,p*-Ph), 128.0, 128.2 (C-9'), 129.6, 129.7, 129.9, 130.2 (C-5''), 130.9, 131.1, 131.8, 132.3, 132.5 (C-8', C $_{\beta}$ ), 134.5, 134.6, 135.3, 135.5 (*Co*-Ph), 142.7 (C-1), 145.2 (C-2), 150.7 (C-1'), 152.8 (C-6a'), 161.3 (C-10b'), 163.2 (C-5'). UV/vis ( $\text{CHCl}_3$ ):  $\lambda_{\text{max}}$  (log  $\epsilon$ ): 420 (4.98), 544 (4.58) nm. HRMS (ESI $^+$ ):  $m/z$  [M+H] $^+$  calcd. for  $\text{C}_{62}\text{H}_{39}\text{BrN}_4\text{O}_3\text{Zn}$ : 1031.1497; found: 1031.1494.

RMN  $^1\text{H}$ :

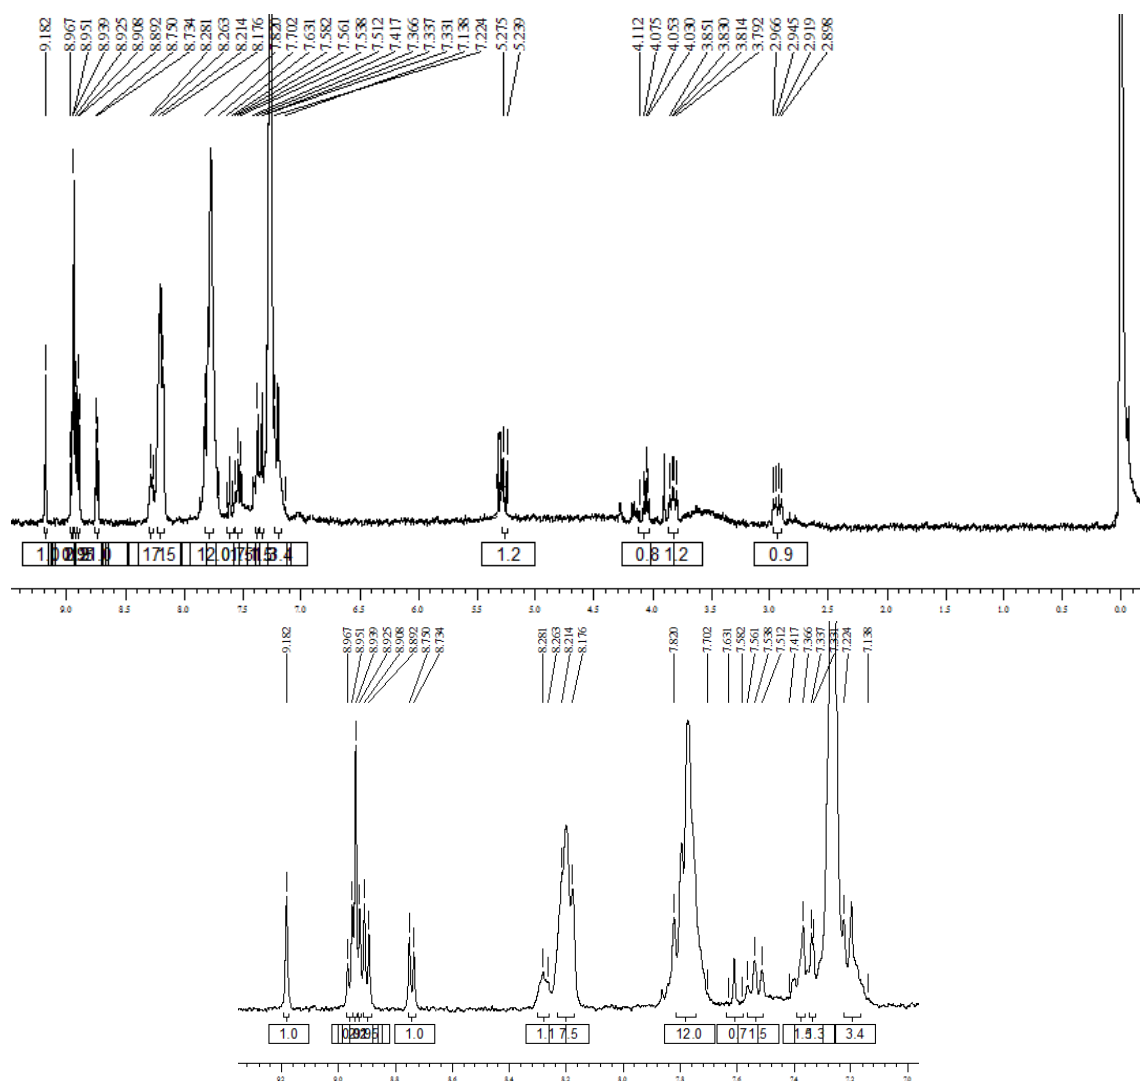

RMN  $^{13}\text{C}$ :

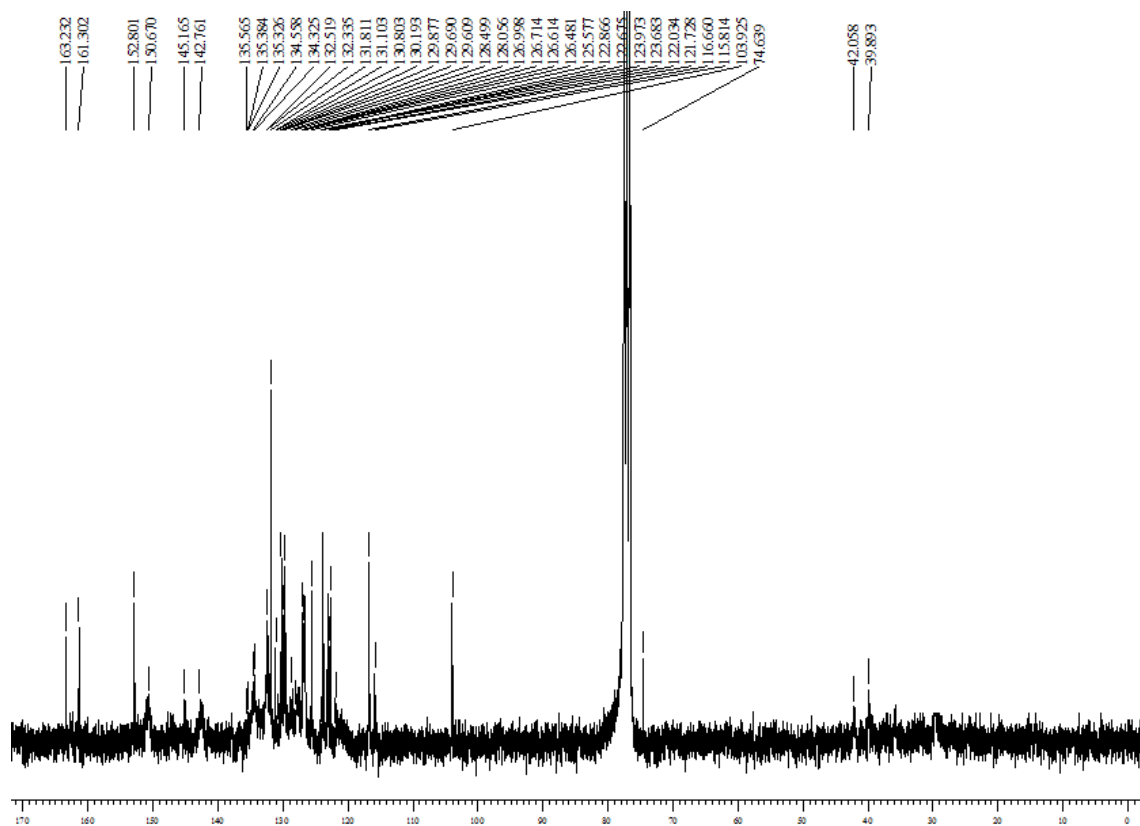

HRMS (ESI $^{+}$ ):

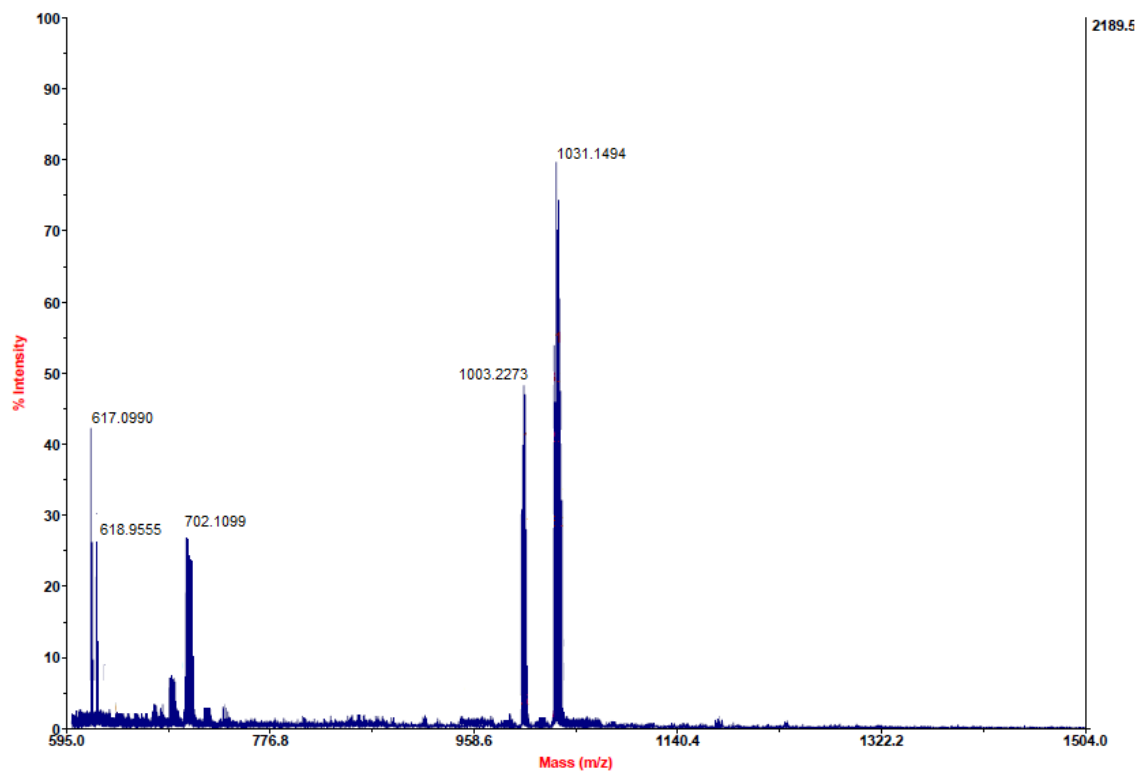



RMN <sup>13</sup>C:

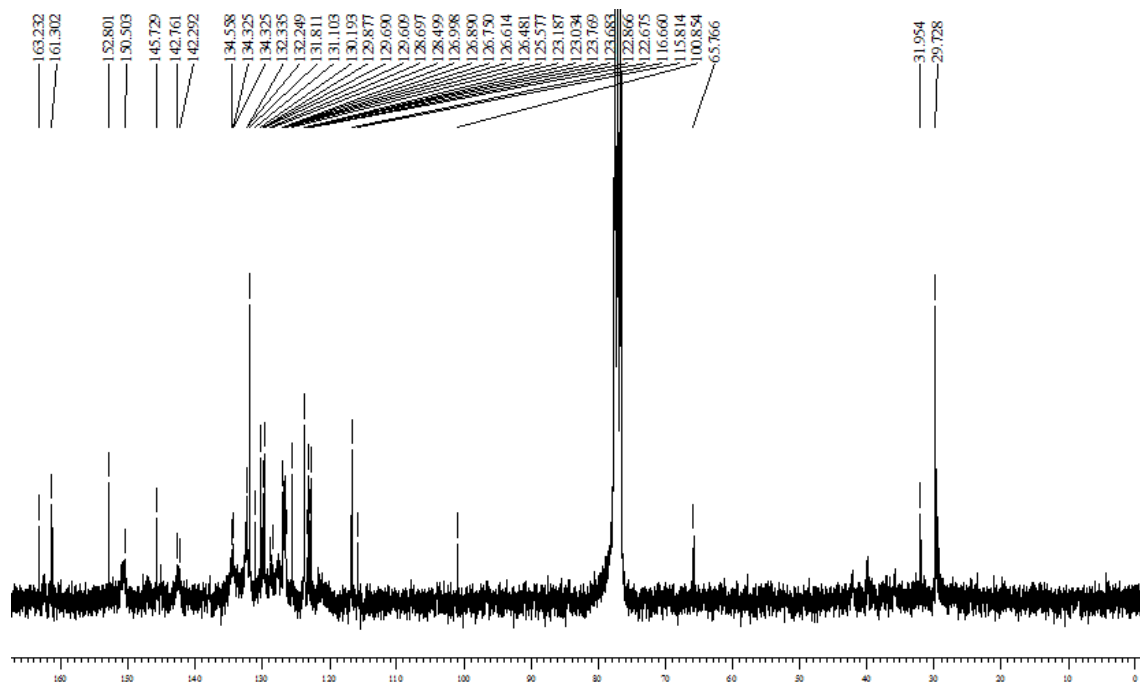

HRMS (ESI<sup>+</sup>):

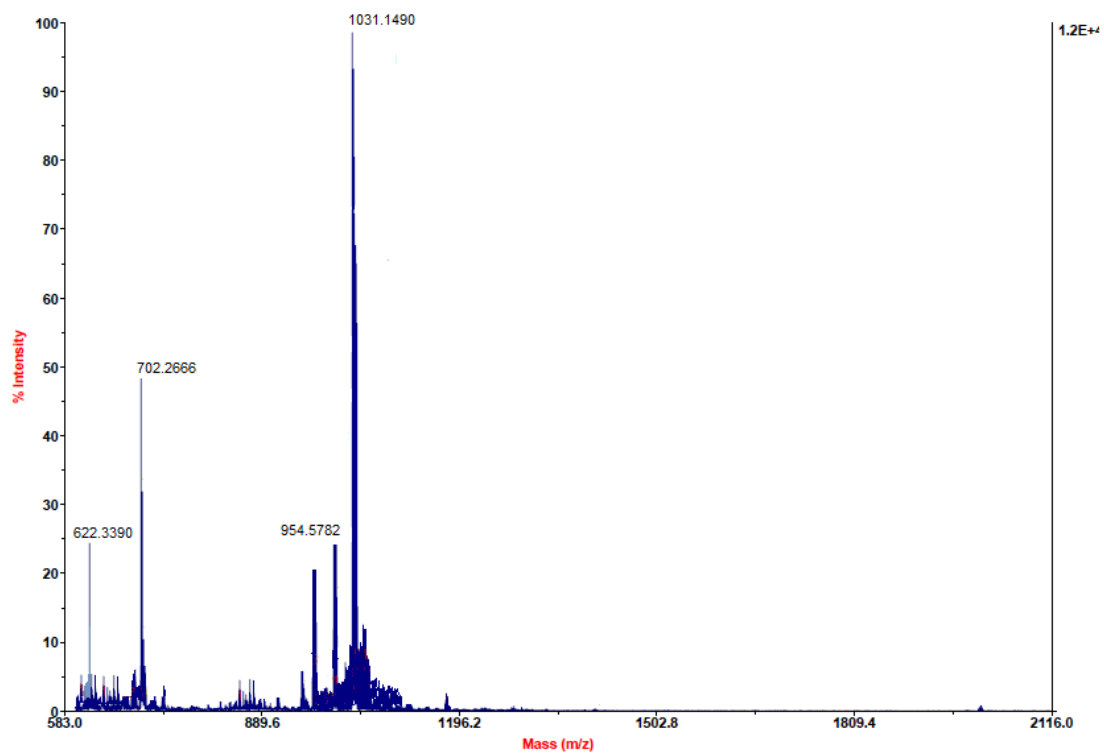

## The ohmic heating reactor prototype

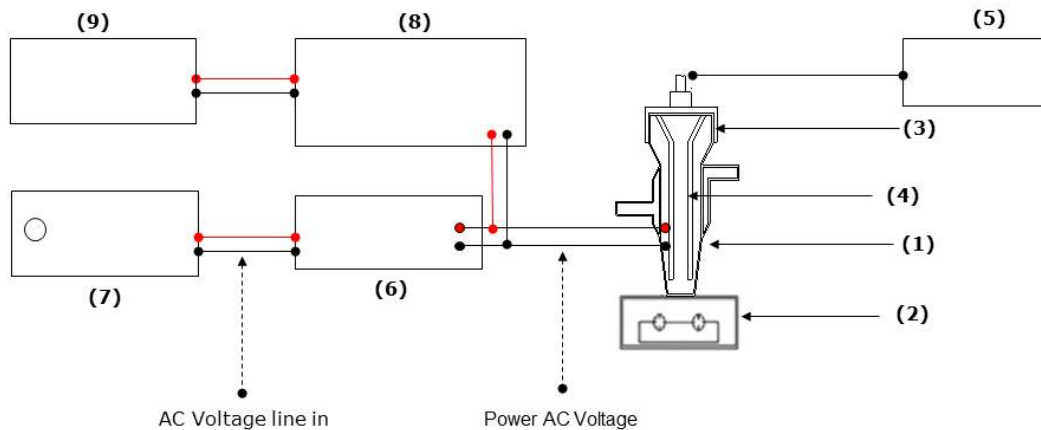

**Figure 1.** Schematic representation of the ohmic heating reactor (**Portuguese Patent n° 105908**)

- 1- 10 mL Glass reactor.
- 2- Magnetic stirring plate and cylindrical magnetic stirrer.
- 3- Reactor cover (PEEK, polyether ether ketone).
- 4- Stainless steel (type 316) cylindrical electrodes, arranged in parallel rods (4 mm of diameter); distance between the electrodes: 10 mm.
- 5- Type J sheathed thermocouple.
- 6- Power amplifier.
- 7- Signal function generator.
- 8- Data acquisition / data logger switch unit (data acquisition of temperature, voltage, frequency, electric current and power in the reactor is done using a software application developed in Agilent VEE).
- 9- Computer.

In ohmic heating, the heating process depends on the electrical impedance, more precisely the AC resistance of the medium and the applied voltage. On the other hand the applied voltage depends on the input power from the amplifier, which also depends on the AC resistance of the medium. As the distance between the electrodes is fixed (10

mm), the field strength applied will vary from experiment to experiment. The frequency used in this work was fixed at 25 KHz.

As an example, herein we present the data of temperature, voltage, electric current and power recorded during one experiment (entry 1 of table 1).

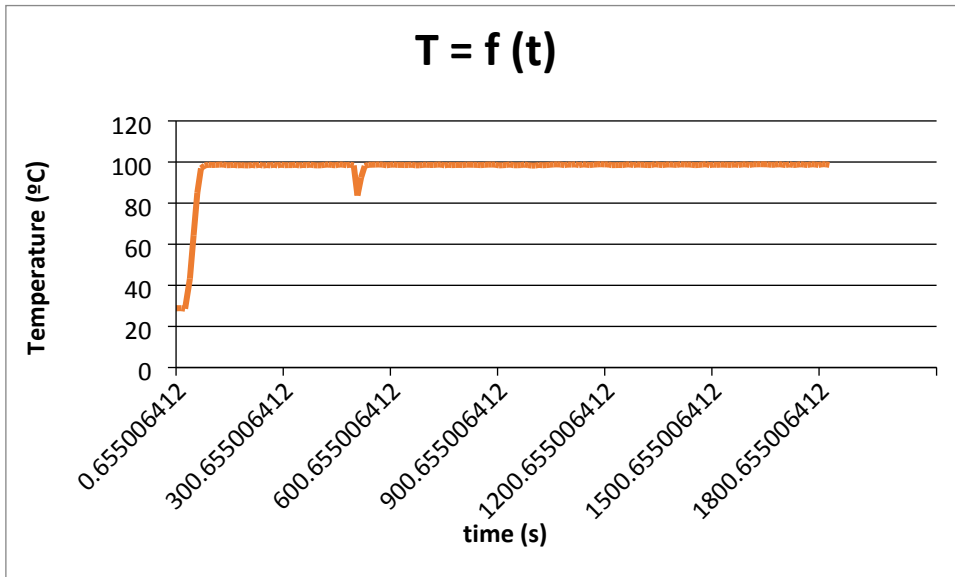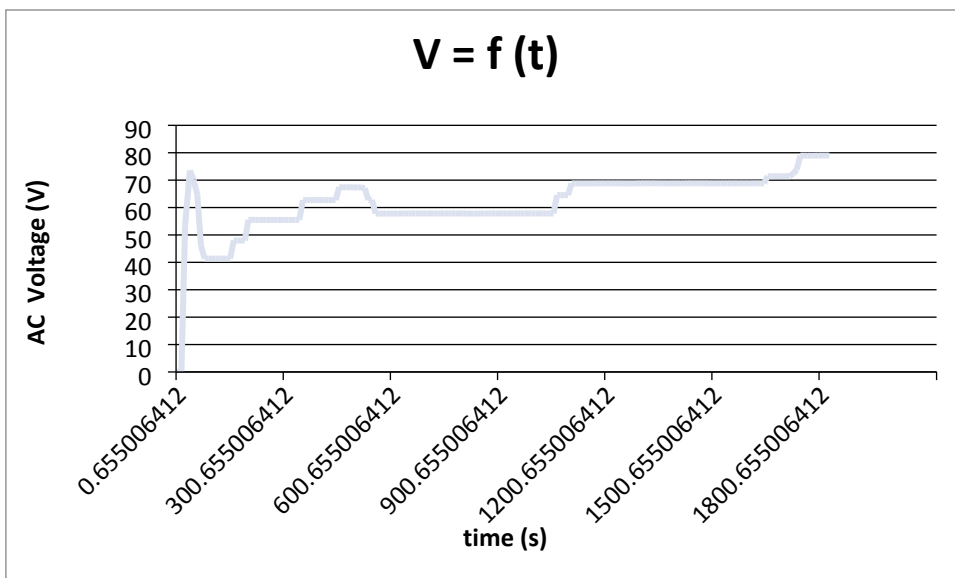



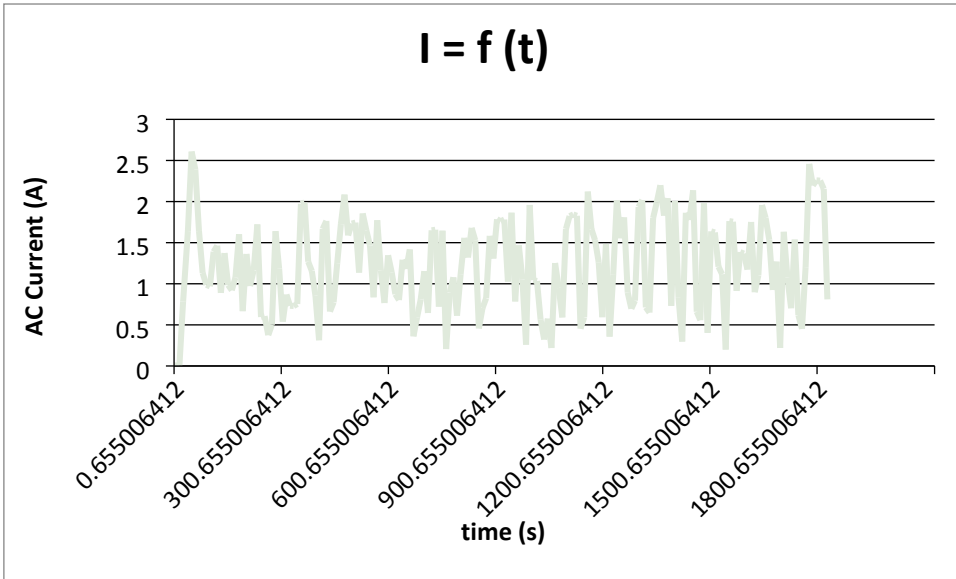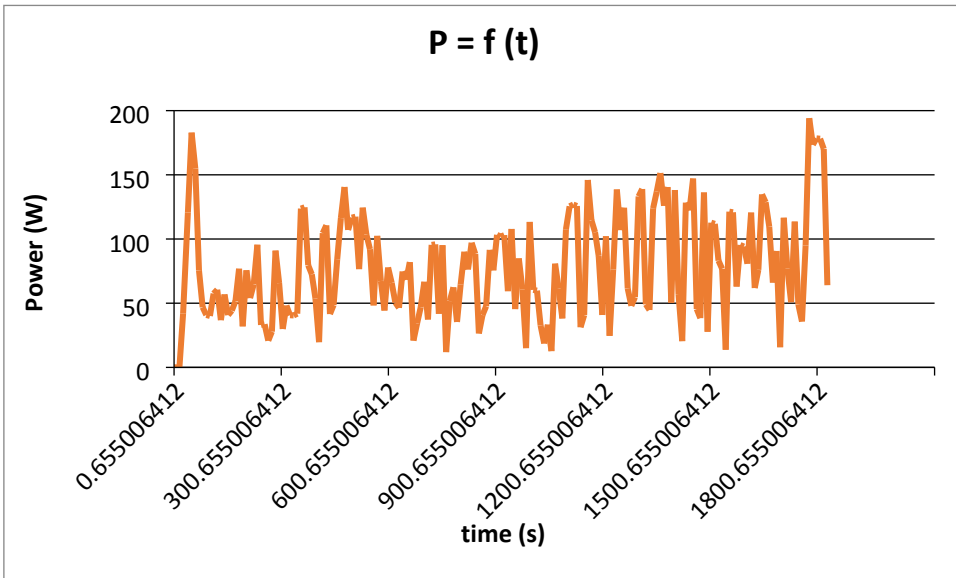

Supplement: c5ra11156k1.pdf [file c5ra11156k1.pdf]
